# Factorial design as a tool to evaluate image analysis workflows systematically: its application to the filament tracing problem

Leandro Aluisio Scholz<sup>1</sup> | Ana Clara Caznok Silveira<sup>2</sup> |  
Maura Harumi Sugai-Guérios<sup>1,3</sup> | David Alexander  
Mitchell<sup>1,2</sup>

<sup>1</sup>Programa de Pós-graduação em Engenharia Química, Universidade Federal do Paraná, Curitiba, Paraná, 81531-980, Brazil

<sup>2</sup>Departamento de Bioquímica e Biologia Molecular, Universidade Federal do Paraná, Curitiba, Paraná, 81531-980, Brazil

<sup>3</sup>Programa de Pós-graduação em Biotecnologia Industrial, Universidade Positivo, Curitiba, Paraná, 81280-330, Brazil

## Correspondence

Leandro Aluisio Scholz, School of Biomedical Sciences, Faculty of Medicine, Room 610 Otto Hirschfeld Building, St Lucia, The University of Queensland 4072, Queensland, Australia  
Email: leandro.a.scholz@gmail.com

**ABSTRACT:** The effect of image enhancement methods on the final result of image analysis workflows is often left out of discussions in scientific papers. In fact, before reaching a definitive enhancement workflow and its settings, there often is a great amount of pre-testing and parameter tweaking. In this work, we take the biofilament tracing problem and propose a systematic approach to testing and evaluating major image enhancement methods that are applied prior to execution of six filament tracing methods (APP, APP2, FarSIGHT Snake, NeuronStudio, Neutube and Rivulet2). We used a full factorial design of experiments to analyse five enhancement methods (deconvolution, background subtraction, pixel intensity normalization, Frangi vessel enhance-

ment and smoothing) and the order in which they are applied, evaluating their effect on the signal-to-noise ratio, structural similarity index and geometric tracing scores of 3D images of a fungal mycelium and a synthetic neuronal tree. Our approach proved valuable as a tool to support the choice of enhancement and filament tracing workflow. For example, the use of deconvolution followed by median filtering gives the best geometric tracing scores if Neutube is used in the image of the fungal mycelium. Also, we show that FarSIGHT Snake and Neutube are the most robust filament tracing methods to changes in image quality. In addition, we reinforce the importance of extensive testing of new filament tracing methods against a broad range of image qualities and filament characteristics.

#### KEYWORDS

image analysis, filament tracing, confocal microscopy, benchmarking, image enhancement, filamentous fungi

## 1 | INTRODUCTION

Research in image processing and analysis has surged over the last two decades. Likewise, image processing and analysis are increasingly being applied in many areas, including material<sup>1</sup> and life<sup>2;3</sup> sciences, contributing greatly to the scientific discoveries in these areas. An increasing number of image analysis workflows is available, but this makes

5 it ever more difficult to choose components of a workflow to solve a specific problem.

6 In this work, we focus on the problem of biofilament tracing, which is a common problem in bioimage analysis<sup>4;5</sup>,  
7 since filaments are everywhere in biology: from blood vessels and plant roots to neurons and fungal mycelia. For  
8 neuronal structures, there are many filament tracing methods from which to choose<sup>6;7;8</sup>. Although most of these  
9 state-of-the-art filament tracing methods were developed to trace neuronal structures<sup>4</sup>, this does not prevent their  
10 use with similar filament structures found in nature.

11 Of course, differences in image quality and filament characteristics may affect the performance of a filament trac-  
12 ing method, if it is used with images that are different from those for which it was initially developed. Thus, it is crucial  
13 not only to define parameters with which the methods may be evaluated, but also to evaluate the many possible com-  
14 binations of methods for image enhancement and filament tracing in a systematic manner. We explore this question  
15 using a 3D image, obtained by confocal laser scanning microscopy (CLSM), of the growth of the filamentous fungus  
16 *Aspergillus niger* on agar-based media and a synthetic image that mimicks a neuronal tree.

17 It is essential to consider whether the quality of the image needs to be enhanced prior to filament tracing. Five  
18 of the most common types of image enhancement methods are: filament or vessel enhancement, smoothing (e.g.  
19 convolution with a median or Gaussian filter), background subtraction, image deconvolution (with a known or synthetic  
20 Point-Spread Function, PSF) and pixel intensity normalization<sup>4</sup>. In order to assess improvements in image quality, two  
21 parameters are commonly used: the Signal-to-noise ratio (SNR) and the Structural SIMilarity index (SSIM)<sup>9</sup>. The SNR  
22 carries information regarding the magnitude of the signal compared to the magnitude of the noise present in the  
23 image. Importantly, the presence and the magnitude of different categories of noise depend on the configuration of  
24 the microscopy equipment used to acquire the images. In confocal microscopy, the pinhole size, the type of detector  
25 and the scan rate all affect the SNR<sup>10;11</sup>.

26 The SSIM is one of a group of image quality parameters based on properties of the human visual system and has  
27 received special attention recently<sup>9</sup>. The SSIM is based on the assumption that the human visual system is highly  
28 adapted to extract structural information about objects; it considers that what one judges to be an image with poor  
29 quality results from perceived changes in structural information of the objects in the image. The SSIM is calculated as

$$SSIM(x,y) = [I(x,y)]^\alpha \cdot [c(x,y)]^\beta \cdot [s(x,y)]^\gamma \quad (1)$$

30 where  $I(x,y)$ ,  $c(x,y)$  and  $s(x,y)$  are functions that quantify luminance, contrast and structure, respectively,  $x$  and  $y$  are  
31 coordinates in the image, and  $\alpha > 0$ ,  $\beta > 0$  and  $\gamma > 0$  are weighting parameters.

32 Besides the image enhancement methods, we have selected six filament tracing methods with available and us-  
33 able implementations: (1) All-path pruning (APP)<sup>12</sup>, (2) All-path pruning 2 (APP2)<sup>13</sup>, (3) FarSIGHT snake<sup>14:15</sup>, (4)  
34 NeuronStudio<sup>16:17:18</sup>, (5) Neutube<sup>19:20</sup> and (6) Rivulet2<sup>21</sup>. The theoretical approaches of these methods included  
35 vary from a blend of intensity based and graph-based tracing to geometric deformable models (e.g. Multi-stencils Fast  
36 Marching). Differently than enhancement methods, improvements in tracing results may be measured by computing  
37 binary classification metrics based on geometric position comparisons if a ground truth is available: For instance, it is  
38 possible to determine the number of true positives and false negative trace points based on the distance between a  
39 point traced by the tracing method and the real ("ground truth") position of the point<sup>22:23</sup>. In this context, true posi-  
40 tives comprise segments of filament correctly traced by a method and false negatives comprise segments of filament  
41 that should have been traced but were not traced by the methods.

42 The aim of the present work is to demonstrate that the full factorial design is a useful tool for exploring the various  
43 possible combinations of image enhancement and filament tracing methods. We evaluated the effects of five image  
44 enhancement methods and six filament tracing implementations on two 3D images: a CLSM image of the mycelium of  
45 a fluorescent strain of a filamentous fungus and a synthetic image that resembles a CLSM image of a single neuronal  
46 tree. We used the SNR, SSIM and geometric tracing scores (e.g. recall, precision and F1-score) to evaluate the degree  
47 to which the image enhancement and tracing methods improve image quality and tracing results.



## 2 | MATERIALS AND METHODS

### 2.1 | Construction of the fluorescent strains

A fluorescent strain, *Aspergillus niger* pgaRed, was constructed from *Aspergillus niger* ATCC 1015 (CBS 113.46)<sup>24</sup>. In *Aspergillus niger* pgaRed, the expression of enhanced green fluorescent protein (eGFP) is controlled by the *gpd* promoter from *Aspergillus nidulans*, a strong constitutive promoter. The eGFP remains in the cytosol and allows visualisation of the specimen under CLSM<sup>24</sup>.

### 2.2 | Image acquisition

*A. niger* was grown on a synthetic complete medium containing: 6.7 g.L<sup>-1</sup> yeast nitrogen base for microbiology (product code 51483; Sigma-Aldrich, Germany), 20 g.L<sup>-1</sup> agar, 120 mmol.L<sup>-1</sup> NaH<sub>2</sub>PO<sub>4</sub> / Na<sub>2</sub>HPO<sub>4</sub> buffer (pH 6) supplemented with 20 g.L<sup>-1</sup> D-Glucose<sup>24</sup>. Spores were spread uniformly over the solidified medium, resulting in 40 spores.mm<sup>-2</sup>. A small cube of the inoculated medium was excised and laid on a glass-bottom Petri dish with 4 chambers, with the inoculated surface perpendicular to the glass surface, before being transferred to the microscope. A moist cotton patch was put into one of the chambers of the glass-bottom dish to ensure that the air in the dish remained saturated with water. The inoculated medium was incubated at 30 °C<sup>24</sup>.

A confocal laser scanning microscope (Nikon A1MP+, Nikon Instruments Inc., Japan) with a temperature-controlled chamber was used to obtain 3D images at different times during growth. A 20x (0.75 NA) lens was used. The eGFP present in the fluorescent strain was excited with a 488 nm wavelength laser and detected with a filter interval ("band pass") of 500-550 nm. Images were acquired with 16-bit grayscale bit depth and converted to 8-bit grayscale. Sample images were 973x973 px with 76 z-stacks and 1 time frame (x y z t). The *xy* resolution was 1.2361 μm and the *z* (axial) resolution was 2 μm. The sample was put under the microscope after 6 h of pre-incubation at 30 °C. The image stack (3D images) was acquired at 22.5 h incubation time<sup>24</sup>.

## 69 2.3 | Generation of the ground truth for the image of the fungal mycelium

70 Several factors can make it difficult to construct a ground truth for 3D images of filaments by manual annotation:  
71 (i) large images or large numbers of images; (ii) a large number of filaments in the image or regions of high filament  
72 density; (iii) a poor image quality, for example, when photobleaching causes foreground sections of the image to be  
73 blurred or to become almost invisible. These difficulties led us to use a point annotation approach for benchmark-  
74 ing of the tracing methods. The approach is the same as the one used to determine the accuracy of single-particle  
75 tracking methods<sup>23</sup>, in which the ground truth comprises a dataset of point coordinates in an image. The procedure  
76 is represented schematically in Figure 3 (a), (c) and (d). First, the 3D image was sectioned into six subvolumes, from  
77 which three  $xz$ -plane images were obtained, resulting in 18 images. The  $xz$ -plane was used to ensure that most of  
78 the filament segments appeared as blobs in the image, given that most of the filaments grew perpendicularly to the  
79  $xz$ -plane (except for the region near the surface of the agar). The  $xz$ -plane images were given to annotators who  
80 identified the centres of the blobs and marked them as points using the multi-point tool of ImageJ. Each of the 18  
81 images was counted by at least three different annotators (See Supplementary Material Section 2 for more details  
82 about the procedure).

83 The annotated points were collected and merged into a single dataset for each image. The position of each blob  
84 identified by the annotators differed slightly, hence it was necessary to use an hierarchical clustering approach in  
85 order to identify and group data points that corresponded to the same blob in the image. Thus, the maximum number  
86 of annotated points per annotator was also determined, which is a required parameter for the hierarchical clustering  
87 algorithm. This value was used as input of the clustering procedure, so that a cluster mean point could be determined.  
88 In order to obtain the cluster mean points, the Euclidean distances between each annotated point and all the remaining  
89 annotated points were calculated using the Matlab® `pdist` function. The points that belong to each cluster were  
90 obtained by using the `linkage` and the `cluster` functions. After finding the points that belong to each cluster, the  
91 mean points were calculated (mean coordinate values of the points that belong to the cluster), which were used later  
92 to calculate the scores.

## 93 2.4 | Factorial design for the evaluation of the enhancement methods

94 A full factorial design was performed to evaluate the effect of five image enhancement methods on the SNR and  
95 SSIM (Eq. 1). The tests were performed using the 3D image of the fungal mycelium (See Supplementary Material for  
96 the raw image *Fungal\_mycelium.tif*) and the following factors: Deconvolution (*Deconv*)<sup>25;26</sup>, Background subtraction  
97 (*BS*)<sup>27</sup>, image intensity normalization (*Norm*), Frangi vessel enhancement method (*Fra*)<sup>28</sup> and smoothing with median  
98 filter (*Med*). The values of the parameters used to perform these enhancement steps are shown in Table 1 and were  
99 evaluated previously<sup>4</sup>. Two additional factors were added, in order to evaluate the degree to which the image quality  
100 results (SNR and SSIM) are affected by the order of application of the methods. Thus, the factors  $ORD_{median}$  and  
101  $ORD_{Norm}$  relate to the order in which median filter and pixel intensity normalization were applied in the tests, re-  
102 spectively. Table 1 shows the seven factors considered in the factorial design and their levels and Figure 4 shows a  
103 reduced  $2^5$  factorial design test table with coded factor levels. The experiments of the design shown in Figure 4 were  
104 done for the four possible combinations of  $ORD_{median}$  and  $ORD_{Norm}$  ((-1, -1); (-1, +1); (+1, -1) and (+1, +1)). An  
105 ImageJ Fiji<sup>29</sup> macro script was written to execute the enhancement operations automatically.

## 106 2.5 | Tracing of the fungal filaments

107 The 32 enhanced images resulting from the previous step were used as input images for six filament tracing methods:  
108 (1) All-path pruning (APP)<sup>12</sup>, (2) All-path pruning 2 (APP2)<sup>13</sup>, (3) FarSIGHT snake (FS)<sup>14;15</sup>, (4) NeuronStudio<sup>16;17;18</sup>,  
109 (5) Neutube<sup>19;20</sup> and (6) Rivulet2<sup>21</sup>. All methods output trace results in the swc file format; this format comprises  
110 a graph representation of the filament tree extracted from the image. A swc file can only represent trees, it cannot  
111 represent filamentous structures with closed loops. Each row in the swc file represents a node and contains seven  
112 columns of information: the node identifier (an integer), its position in space (in Cartesian coordinates x, y, and z), a  
113 structure identifier (developed to identify neuronal structures), its radius and its parent node (Figure 1).

114 The filament tracing methods were then run at least once on the 32 test images (the parameter settings are  
115 available in the Supplementary Material spreadsheet *tracing\_parameters.xls*). The tracing results were evaluated both

**TABLE 1** Factors considered in the factorial design and their levels

| Factor         | Description                                                                           | Low level (-1)                        | 1 High level (+1)                                             |
|----------------|---------------------------------------------------------------------------------------|---------------------------------------|---------------------------------------------------------------|
| $ORD_{median}$ | Position of the median filter in the order of pre-processing                          | Median is applied after <i>Deconv</i> | Median is applied last                                        |
| $ORD_{Norm}$   | Position of the normalization operation in the order of pre-processing                | Normalization occurs before Frangi    | Normalization occurs after Frangi                             |
| <i>Deconv</i>  | Image deconvolution with calculated PSF <sup>1</sup>                                  | Do not apply image deconvolution      | Apply image deconvolution with calculated PSF                 |
| <i>BS</i>      | Operation background subtraction with rolling ball algorithm <sup>2</sup>             | Do not apply <i>BS</i>                | Apply <i>BS</i> , ball radius 20 pixels                       |
| <i>Norm</i>    | Operation of image intensity normalization <sup>3</sup>                               | Do not apply normalization            | Apply normalization with 0.4% saturated pixels                |
| <i>Fra</i>     | Frangi vessel enhancement: multiscale Hessian based filament enhancement <sup>4</sup> | Do not apply Frangi                   | Apply Frangi with 5 Levels, 2 px lower and 5px upper diameter |
| <i>Med</i>     | Convolve image with median filter <sup>5</sup>                                        | Do not apply median filter            | Apply median filter with kernel 3 pixels                      |

<sup>1</sup> The PSF was calculated using *PSF Generator* plugin<sup>25</sup>, while deconvolution was done with *DeconvolutionLab2*<sup>26</sup>.

<sup>2</sup> Background subtraction was performed using the rolling ball radius algorithm<sup>27</sup> implementation<sup>30</sup> in ImageJ.

<sup>3</sup> The built-in function *Enhance contrast* of ImageJ was used to perform this operation.

<sup>4</sup> The images enhanced by Frangi were obtained by using the *imglib2* plugin implementation in Fiji.

<sup>5</sup> The built-in ImageJ function *Filters*, '*Median*' was used.

116 quantitatively through the computation of scores (see section 2.6) and qualitatively through the visualization of the  
 117 tracings. The best tracing method was selected based on two criteria: first, the score value should be one of the  
 118 highest among the tested methods. Second, the connectivity of the tracing should be as accurate as possible when  
 119 compared visually to the raw images of the mycelium.

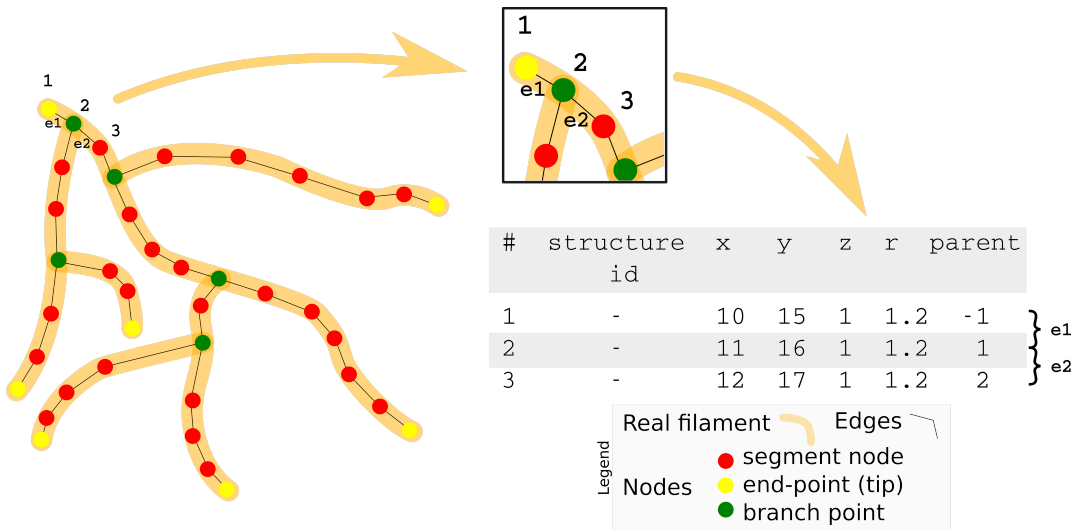

**FIGURE 1** Schematic representation of the result of a filament tracing method. The nodes and edges of the tracing result should overlap with the position of the real filament. A small region with nodes (1,2 and 3) and edges (e1 and e2) is identified and shows an example output of the swc file format as a list of nodes that provide the node identification (id), its position in the image ( $x$ ,  $y$  and  $z$  coordinates), its radius (in pixels) and the parent node, which defines the edges between the nodes.

## 120 2.6 | Computation of the scores

121 Based on the ground truth annotations and the results of each tracing method, four different scores were computed  
 122 to help evaluate the quality of the tracings: recall (or True Positive Rate), precision (or Positive Predictive Value), the  
 123 F1-score and the Jaccard similarity coefficient,  $JSC$  (Figure 2). Single-particle tracking scores were used due to the  
 124 difficulty in generating complete manual tracings of our images (the hyphae in the image were densely packed in some  
 125 regions and the quality of the images made manual tracing too difficult).

126 The effects of the factors and their interactions on the F1-score were also evaluated. The result of the factorial

127 design is an adjusted linear model that describes the value of the outcomes as a function of each factor and their  
 128 interactions (combinations):

$$S = \beta_0 + \beta_1 \cdot X_1 + \beta_2 \cdot X_2 + \beta_3 \cdot X_3 + \beta_4 \cdot X_4 + \beta_5 \cdot X_5 + \beta_6 \cdot X_1 X_2 + \dots + \beta_{32} \cdot X_1 X_2 X_3 X_4 X_5 \quad (2)$$

129 where  $S$  is an outcome (F1-score),  $X_1, X_2 \dots X_5$  are the coded factor levels (-1 and 1) and  $\beta_0, \beta_1 \dots \beta_{32}$  are the coeffi-  
 130 cients for the factors and their combinations.

131 Three parameters are required in order to calculate the scores, the spatial tolerances in the x, y and z planes  
 132 around the annotated or traced points that will be considered in the point matching process, defined as  $\delta_x, \delta_y$  and  
 133  $\delta_z$ . All tolerances are given in pixels. Figure 3 provides a detailed graphical representation and description of the  
 134 calculation of the scores.

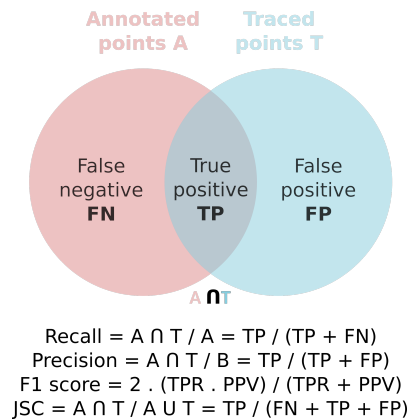

**FIGURE 2** Venn diagram that shows how the four scores are calculated.  $A$  comprises the annotated points in the images of the  $xz$  plane and  $T$  is the point dataset of the traced images with their  $x,y,z$  coordinates. Recall is calculated by the number of matched points divided by the number of untraced plus the matched points. Precision is given by the number of matched points divided by the number of traces of non-existing filaments plus the matched points. The F1-score is calculated as the harmonic mean of the recall and precision. Finally, the JSC is calculated by the famous intersection over union calculation, which is the matched points divided by the total number of points of the tracings and annotated points.

## 135 2.7 | Comparison of the tracing results of the synthetic image with the known ground 136 truth

137 The same procedures described in 2.4 and 2.5 were performed on a synthetic image generated with the TREES tool-  
138 box<sup>31</sup>. The resulting ground truth graph representation was converted into a 3D binary mask with Vaa3D<sup>32</sup>. Then,  
139 the image was convolved with a synthetic PSF (Born and Wolf) generated with PSF Generator<sup>25</sup> and noise was added  
140 with the help of RandomJ<sup>33</sup>. Following the enhancement tests and tracing with the same methods listed in 2.5, recall,  
141 precision, F1-score and JSC were calculated for the tracing results. In this case, since a ground truth was available,  
142 the scores were computed using the complete list of nodes from the ground truth.

## 143 3 | RESULTS

### 144 3.1 | Enhancing and tracing the image of the fungal mycelium

145 We executed a series of image enhancement operations on the 3D image of the fungal mycelium and calculated  
146 the SNR (Figure 4, columns shaded red) and SSIM (Figure 4, columns shaded yellow) of the enhanced images for  
147 all 128 tests that comprise the full factorial design, which considers the factors ORDmed and ORDnorm. Figure 4  
148 shows the results for the order DECONV/BS/NORM/FRA/MED (The results for the other orders are shown in the  
149 Supplementary Material Figures S1.1 and S1.2). The different orders did not affect the SNR and SSIM significantly:  
150 An analysis of variance (ANOVA) for the SNR gave a  $p$ -value of 0.939 (F value = 0.136  $\alpha$  = 0.05), while a Kruskal-Wallis  
151 test, gave a  $p$ -value of 0.2097 ( $\chi^2$  = 4.52295,  $\alpha$  = 0.05). Likewise, an ANOVA for the SSIM values gave a  $p$ -value of  
152 0.971 (F value = 0.08  $\alpha$  = 0.05). Thus, we only considered the order of enhancement operations indicated in Figure 4  
153 (see Supplementary Material Section 1 for more details). The calculation of the SNR and SSIM used the deconvolved  
154 image (test 2) as the reference image. Thus, the values of test 2 correspond to the maximum possible values for both  
155 SNR and SSIM.

156 The next highest values of SNR were those of tests 4, 18, 3 and 20. These tests correspond to the tests that used

157 deconvolution and background subtraction (test 4), deconvolution and median filtering (test 18), background subtraction (test 3), and all three (test 20 included deconvolution, background subtraction and median filtering). Furthermore, 158 two groups of tests, 1 to 8 and 17 to 24, resulted, on the whole, in relatively high SNR values; in these groups Frangi 159 vessel enhancement was not applied to the images. However, tests 5, 7 and 21 within these groups have relatively 160 low values of SNR. These relatively low values correspond to the use of pixel intensity normalization without prior 161 deconvolution (5 and 7) and to the use of background subtraction, pixel intensity normalization and median filtering. 162 The use of pixel intensity normalization increased the level of noise in the image, resulting in a SNR lower than zero 163 dB and the prior subtraction of the background did not reduce the noise levels in tests 7 and 21. Similarly to the SNR 164 results, after test 2, tests 4, 18 and 3 gave among the highest values of SSIM: the best SSIM values were for tests 4, 165 18, 24 and 3, in this order. Test 24 did not give a particularly high SNR (it was the 7th highest SNR value); it is the 166 test in which all enhancement methods were used, except Frangi vessel enhancement. As was the case with the SNR 167 values, the test groups 1 to 8 and 17 to 24 gave relatively high SSIM values on the whole, although tests 5 and 21 168 gave the lowest SSIM values. 169

170 All enhanced images were traced with six different filament tracing methods and the tracing results were compared with a ground truth in order to calculate recall and precision (Figure 4, columns shaded blue). The first set of 171 columns shaded in blue shows the recall results and the second set shows precision results for eight runs with different sets of parameters of the six filament tracing methods. Generally, there are large differences among the values 172 for each method. With respect to recall, the worst performing tracing methods were APP2, APP and Rivulet2. When 173 APP2 was applied to images that had been enhanced without using Frangi vessel enhancement, the recall values were 174 higher. On the other hand, when APP2 was applied to images that had been enhanced using Frangi vessel enhancement, the recall values were low and, in some cases, APP2 failed to trace filaments in the regions where ground truth 175 points exist (six subvolumes of the whole image were annotated, not the entire image) thus giving recall values of 176 zero. Also, APP did not perform well with images in which Frangi vessel enhancement had been used. The lowest 177 values of recall were obtained for images that had been enhanced using both Frangi vessel enhancement and median 178 filtering (tests 25 to 32). The best performing tracing methods were Neutube and FarSIGHT Snake (when recall was 179 used as criterion), with mean recall values of 0.782, 0.729 and 0.738 (for Neutube-1, Neutube-2 and FarSIGHT Snake, 180 181 182



183 respectively). For Neutube, there was a similar pattern of recall values across the tests, but the negative effect of  
184 Frangi vessel enhancement and median filtering was weaker (compare tests 1-16 with tests 17-32). With FarSIGHT  
185 Snake, the factors interacted in more complex manners: Pixel intensity normalization affected recall positively (tests  
186 5-8, 13-16, 21-24, 29-32), whereas the use of Frangi vessel enhancement followed by median filtering had a slight  
187 positive effect compared to when Frangi vessel enhancement was applied without median filtering (compare tests  
188 9-16 with tests 25-32).

189 APP2 and Neutube were the best performing methods when precision was the criterion: the highest mean pre-  
190 cision values were obtained with APP2 and both Neutube-1 and Neutube-2 (the APP2-2 value of 0.677 being the  
191 highest). In contrast, the low precision values of the APP and Rivulet2 methods show that they oversegment the fila-  
192 ments, thus generating too many false positive nodes. Despite the low precision values for the majority of the tests  
193 with APP, APP had greater precision values in tests where Frangi vessel enhancement and median filter were applied  
194 together (tests 25 to 32 compared to tests 9 to 16), with the precision reaching values as high as those obtained with  
195 APP2 and Neutube. Interestingly, the effect of enhancement methods on the final precision values of all filament  
196 tracing methods was less pronounced than their effect on recall values: the standard deviation of the precision values  
197 was much lower than the standard deviation of the recall values.

198 Although it is valuable to analyse precision and recall results alone, it is also important that the tracing method  
199 chosen gives high values for both precision and recall. Therefore, the F1-score and JSC are better measures of overall  
200 performance of the tracing methods, since they are calculated using both precision and recall values. Figure 5 shows  
201 the F1-score and JSC for the best performing methods. The F1-score and JSC results are almost equivalent for evalu-  
202 ating the performance, so we focus on F1-score in the analysis that follows. APP2 was the tracing method that gave  
203 the broadest range of F1 values and also had the most uniform distribution through its range (note that the violin  
204 plot for APP2 does not show a clear peak, such as is visible in the violin plot for FarSIGHT Snake). This shows that  
205 APP2 was the method that was most sensitive to changes in the image enhancement methods used. However, some  
206 of its scores were higher than those of FarSIGHT snake, especially those scores for tests that did not include Frangi  
207 vessel enhancement and median filtering (See Supplementary Material, Table S1.2). Conversely, FarSIGHT Snake was  
208 the tracing method that was least sensitive to changes in the image enhancement methods used. This is indicated

209 by the relatively small range of F1-values (minimum of 0.49 and maximum of 0.575) and the standard deviation of  
210 0.022%. In the end, Neutube was the best performing tracing method when the F1-score was the criterion: in two  
211 runs with different parameters, it obtained mean F1-score values of 0.685 and 0.674 and standard deviations of 0.097  
212 and 0.094%. The highest F1-score (0.765) was achieved with Neutube-1 in test 18, in which enhancement operations  
213 were deconvolution followed by median filtering. Neutube F1-score values were significantly better than those of  
214 the other filament tracing methods, since a Kruskal-Wallis test ( $\chi^2 = 143.13$ ,  $df = 7$ ,  $p\text{-value} = 2.2 \cdot 10^{-16}$ ) followed by  
215 a Dunn test for pairwise comparison of Neutube against the other methods using rank sums provides the following  
216 adjusted p-values (Bonferroni method): APP =  $7.403 \cdot 10^{-16}$ , APP2 =  $5.892 \cdot 10^{-16}$ , APP2<sup>2</sup> =  $1.230 \cdot 10^{-4}$ , FarSIGHT  
217 Snake =  $4.970 \cdot 10^{-4}$  and NeuronStudio =  $3.253 \cdot 10^{-5}$ , which confirm that the null hypothesis of the Dunn test is  
218 rejected in all cases<sup>34</sup>.

219 Figure 6 shows the test image with the results of several tracing methods. Tracing methods such as APP and  
220 Rivulet2 (Figure 6(c-d)) generally gave tracing results with too many nodes, which led to a low precision. However,  
221 a tracing result with a dense concentration of nodes (in other words, an "oversegmented" trace result) may or may  
222 not be topologically incorrect. For example, the APP results are topologically incorrect due to the spurious branches,  
223 whereas the Rivulet2 tracing results appear to be topologically correct, since the additional nodes do not form spurious  
224 branches. APP2 and Neutube gave high precision, but low recall: despite failing to segment all the filaments, they  
225 found an accurate position of the detected filaments (Figure 6(e-f)). Neutube with test 18 and NeuronStudio with  
226 test 23 were the best performing combination of enhanced images and tracing methods: They had a good balance  
227 between recall and precision (Figure 6(g-h)). This confirms that the F1-score is well suited for evaluating the results.

228 The final outcome of the factorial design is the set of coefficients of the effects, on the F1-score, of the factors  
229 alone and in combinations. Figure 7 shows a chord graph, which represents the coefficients as chords, with the  
230 chord width corresponding to the value of the coefficient. In other words, the chord graph shows the magnitude of  
231 the effects of each factor (i.e. of each enhancement method) on the tracing score of any tracing method and also  
232 shows the overall effect of the individual factors on all tracing methods, with the magnitude of this overall effect  
233 corresponding to the arc length. For example, the most negative factor was the use of Frangi vessel enhancement  
234 alone since its arc length is the largest among the factors and most of its chords represent negative coefficient values,

235 with APP2 and NeuronStudio having the most negative values. Deconvolution was the second most negative factor,  
236 with negative coefficients for all tracing methods except Rivulet2, although there were no significant differences in  
237 the moduli of the coefficient values of the tracing methods. On the other hand, the most positive factor was the  
238 combined use of deconvolution and median filtering but its relative importance compared to the other factors was  
239 not significant. The combined use of deconvolution, Frangi vessel enhancement and median filtering had the second  
240 most positive effect on the tracing methods.

241 Finally, the best method for the image of the fungal mycelium was Neutube. On the whole, the Neutube method  
242 had relatively high recall values (tests > 0.75) and intermediate precision values (tests that gave precision values  
243 between 0.5 and 0.75), an example is shown in Figure 6(g) (Neutube-1 test 18). Also, Figure 7(a) shows that there  
244 was no specific factor impacting F1-score more significantly than the others, as the values of the coefficients are  
245 not so different from each other (minimum of  $-0.038$  for FRA:MED two-factor interaction, maximum of  $0.0198$  for  
246 DECONV:BS:FRA:MED four-factor interaction and mean of  $-0.004$ ).

## 247 3.2 | Enhancing and tracing the synthetic image

248 In order to provide more insights into the analysis of the image enhancement methods and tracing results, we used the  
249 same study procedure to test a 3D image generated synthetically. However, the synthetic image has several features  
250 that distinguish it from the image of the fungal mycelium. First, the filaments are not of uniform diameter, rather  
251 filaments near the central point from which all the filaments spread have a larger diameter, while filaments that are  
252 more distant from the origin have smaller diameters; in some cases, the diameter is reduced almost to the limit of  
253 resolution of the image (2 pixels). Second, the intensities of the pixels composing the filaments are higher than those  
254 of the fungal mycelium image, showing pixel intensities of approximately 186 compared to 106 of the image of the  
255 fungal mycelium. Finally, in the synthetic image there are no regions in which filaments are densely packed whereas  
256 most of the image of the fungal mycelium had densely packed filaments (region of the image within  $y = [0, 350]$ ).

257 The synthetic image was convolved using a synthetic PSF and then noise was added, so that its quality would  
258 resemble that of a real image (see Section 2.7). In spite of the differences in the features of the two tested images, the

259 results for SNR, SSIM, recall and precision for the synthetic image (Figure 8) were similar to those previously obtained  
260 with the image of the fungal mycelium (Figure 4). Tests 4, 6, 8 and 18 gave the highest SNR values (see the column  
261 shaded in red/pink), whereas tests 4, 18 3 and 20 had given the highest SNR values with the image of the fungal  
262 mycelium. These results confirm that the use of deconvolution and combinations of background subtraction, pixel  
263 intensity normalization and median filtering yield the greatest improvements in SNR compared to the original image  
264 (test 1). Moreover, SNR is negatively affected if Frangi vessel enhancement and median filtering are applied. As was  
265 the case for the SNR results, tests 4, 8, 6 and 18 gave the highest SSIM values. Following the same pattern as the  
266 results of the image of the fungal mycelium, the groups of tests with the highest SSIM values were 1 to 8 and 17 to  
267 24 and the lowest values of SSIM occurred when images were enhanced with Frangi vessel enhancement followed  
268 by median filtering (tests 25-32).

269 The recall results of the synthetic image have similarities with the recall results of the image of the fungal mycelium,  
270 but with more details (i.e. no zero recall values). For instance, recall results for APP and APP2 showed drastic differ-  
271 ences between the group of tests that used Frangi vessel enhancement (either alone or with median filtering) and the  
272 group of tests that did not apply such enhancement methods. Pixel intensity normalization affected tracing by APP  
273 in a more complex manner, as can be seen by comparing tests 1-4 with tests 5-8 and tests 17-20 with tests 21-24.  
274 It reduced recall values of APP (for instance, compare tests 1-4, which did not use pixel intensity normalization, with  
275 tests 5-8, which used it), whereas when median filtering was also applied, the negative effect of pixel intensity nor-  
276 malization was minimized, which indicates a synergy between these two factors. Another interesting synergic effect  
277 occurred in APP, APP2 and NeuronStudio: when deconvolution was applied without Frangi vessel enhancement, the  
278 recall results were usually higher compared to tests that did not apply deconvolution. However, when Frangi vessel  
279 enhancement was applied after deconvolution, the recall values were lower than those for the tests that did not ap-  
280 ply deconvolution. In contrast with APP and APP2, FarSIGHT Snake and Neutube had the best overall recall values  
281 and were more robust, that is, the difference between the minimum and maximum recall values was low when the  
282 different enhancement methods were used (mean values of 0.73 and 0.582 and standard deviations of 0.093 and 0.154,  
283 respectively). However, based on the best test values, Neutube had only the 5th highest recall value, with FarSIGHT  
284 Snake (0.918), NeuronStudio and APP (both 0.872) and APP2 (0.817) having higher recall values. Furthermore, the Far-

285 SIGHT Snake results also showed a positive synergic effect between factors: the use of Frangi vessel enhancement  
286 and median filtering increased the recall value, which did not happen in the case of the image of the fungal mycelium.

287 The results for the precision of the tracing methods show distinct patterns for the synthetic image. Even though  
288 the results are different in comparison with those obtained for the fungal mycelium, Rivulet2 was still the tracing  
289 method that gave the lowest precision values, with an average precision of 0.463. However, the difference among  
290 tests with high and low precision (standard deviation of 0.190) was higher than that obtained with the image of the  
291 fungal mycelium. In this manner, Rivulet2 gave both high precision (0.867 in test 20, with deconvolution, background  
292 subtraction and median filtering) and low precision (0.110 in test 5, with pixel intensity normalization). In addition,  
293 Rivulet2 did not show such a high positive influence of Frangi vessel enhancement on precision as occurred with the  
294 image of the fungal mycelium, since there was a negative synergy between Frangi vessel enhancement and median  
295 filtering. The second lowest precision values were, again, those of the APP method; the pattern of values across the  
296 various tests was similar to that obtained with the image of the fungal mycelium. The best and second best overall  
297 precision values were obtained with Neutube and NeuronStudio, with overall precision values of 0.864 and 0.775,  
298 respectively, and a standard deviation of 0.074 in both cases.

299 Although NeuronStudio gave the second best mean precision values (0.775), it gave the highest precision among  
300 all tracing methods with test 19 (0.999). Neutube was more sensitive to the use of Frangi vessel enhancement, with  
301 precision values that were marginally higher than those obtained in the corresponding tests with the image of the  
302 fungal mycelium. The same occurred with the use of median filtering, for which Neutube again gave marginally higher  
303 precision values than those obtained in the corresponding tests with the image of the fungal mycelium. There was  
304 also a clear positive synergic effect of deconvolution and Frangi vessel enhancement: when deconvolution was used  
305 without Frangi vessel enhancement, precision values were always lower. Tests 1-8 and 17-24 gave relatively high  
306 precision values, with test 19 giving the highest value (0.974). NeuronStudio gave clearer patterns for precision values  
307 amongst the tests than those obtained with the image of the fungal mycelium, since there were greater differences  
308 between the values (the minimum and maximum values were zero and 0.999, respectively, as opposed to 0.371 and  
309 0.582 for the image of the fungal mycelium). Thus, despite performing better with the synthetic image, NeuronStudio  
310 was more sensitive to changes in the quality of the image. Although relatively high precision values were obtained for

311 tests 1-8 and 17-24, these intervals also contained some relatively low values (Test 5 and 7), with these low values  
312 occurring when pixel intensity normalization was applied alone or with previous background subtraction. The lowest  
313 precision values occurred in tests 30 and 32, showing that the simultaneous use of deconvolution, pixel intensity  
314 normalization, Frangi vessel enhancement and median filtering caused NeuronStudio to fail to trace the image.

315 Figure 5 (b) shows the F1-score and JSC obtained for the various tracing methods with the synthetic image. With  
316 this image, the overall best performer was FarSIGHT Snake: it was the most robust method, with a low standard  
317 deviation of scores, and also gave the highest mean F1-score, 0.737. Neutube was the second best performer, with a  
318 mean F1-score of 0.682, but a greater spread of scores. Despite being the two best performing tracing methods overall,  
319 both FarSIGHT Snake and Neutube were outperformed by NeuronStudio when tests were evaluated individually.  
320 NeuronStudio had the best F1-scores with tests 1-4, with values up to 0.930 (test 2), whereas FarSIGHT Snake had  
321 its best F1-score, of 0.887, in test 3 and Neutube, of 0.844, in test 5. However, NeuronStudio, among all the tracing  
322 methods, gave the greatest spread of F1-scores, with a range of 0.925 (0.327 standard deviation).

323 Figure 7(b) shows the coefficients of the effects, both individually and in combination. Frangi vessel enhancement  
324 and median filtering had the greatest negative effects. Except for Rivulet2, the tracing methods gave lower F1-scores  
325 when Frangi vessel enhancement was applied. Also, all tracing methods gave lower F1-scores when median filtering  
326 was applied in comparison to when it was not applied. In the case of NeuronStudio, Frangi vessel enhancement alone  
327 and deconvolution followed by Frangi vessel enhancement had the greatest negative effects. Frangi vessel enhance-  
328 ment accounted for almost 30% of the sum of the moduli of the coefficient values, whereas deconvolution followed  
329 by Frangi vessel enhancement accounted for about 10%. However, it was advantageous to use deconvolution without  
330 Frangi vessel enhancement, as the signs of the effect coefficients changed, resulting in the highest possible F1-score  
331 in this case (test 2). The positive effects accounted for a relatively small proportion of the coefficients (24% of the  
332 sum of the moduli of the coefficients). Conversely, FarSIGHT Snake, the best overall performer and the most robust  
333 method, had smaller coefficient values and a fairly even distribution of positive and negative coefficients (positive  
334 effects accounted for about 53% of the total sum of the moduli of coefficients). Even so, only two of the main effects  
335 were positive: background subtraction and pixel intensity normalization. Additionally, the two-factor interactions of  
336 the negative effects, for example, "deconvolution and Frangi vessel enhancement" and "Frangi vessel enhancement

337 and median filtering”, accounted for the greater part of the positive effect on the F1-score. Thus, as was the case with  
338 NeuronStudio, it was most beneficial to use a single enhancement method, background subtraction in this case, to  
339 yield the best F1-score (test 3).

## 340 4 | DISCUSSION

341 The present work makes three main contributions: First, it shows that the factorial design approach is also useful to  
342 help understand the strengths and limitations of filament tracing methods, since the many enhancement operations  
343 provided a wide range of images with different qualities and features. Second, it shows that factorial designs can help  
344 researchers to evaluate the effect of image enhancement methods and choose those that fit best with their dataset.  
345 Finally, the results of this work reaffirm the importance of benchmarking filament tracing methods. In the following  
346 sections, each of the contributions will be discussed in depth.

### 347 4.1 | Factorial designs help researchers assess the strengths and limitations of filament 348 tracing methods

#### 349 **An assessment of strengths and limitations of the tracing methods based on their theoretical approach to** 350 **tracing**

351 Our work gives insights into the strengths of the tracing methods and allows us to assess whether the limitations that  
352 were mentioned by the authors when the tracing methods were first published are present when they are used in our  
353 test images. NeuronStudio is the oldest method available amongst the ones we tested. Our tests show that the tracing  
354 results of NeuronStudio were very poor when the enhanced images contained disconnected filaments, low intensity  
355 filaments, nonuniform intensities throughout the filaments or heavy background noise. These three features could be  
356 caused by (i) Frangi vessel enhancement, which does not enhance branch points but rather suppresses them<sup>14:41</sup>, (ii)  
357 any method that could reduce the foreground intensities (median filtering, Frangi vessel enhancement, deconvolution

358 and combinations thereof) and (iii) pixel intensity normalization, which may intensify noise if applied before a noise  
359 reduction method. The fungal mycelium image used in the present work was slightly less noisy than the synthetic  
360 image (the SNR of the raw image, test 1, was 2.09 compared to the SNR of 1.86 for the synthetic image), though the  
361 fungal mycelium contained a region that had more densely packed filaments. As a result, the negative effect of pixel  
362 intensity normalization was minimized for the image of the fungal mycelium; also, the negative effect of suppressing  
363 branch points in the image was greater in the real image, which had the more complex filament tree. The high variations  
364 in the F1-score of NeuronStudio are associated with its intensity-based approach, namely voxel scooping. In voxel  
365 scooping, the image is binarized and the filament paths are traced in increments from a seed-point (in a process known  
366 as “region growing”).

367 APP is a graph-based tracing method. The main step in its tracing process involves the generation of a sparse  
368 graph from an oversegmented mask of the image, with vertices being foreground voxels that are connected to their  
369 direct neighbours and with edge weights that are proportional to the intensity gradient between the voxels<sup>12</sup>. The  
370 subsequent steps remove redundant nodes from the graph. Our tests show that APP was very sensitive to the differ-  
371 ence between the intensities of the foreground and background: when foreground pixels were dim, APP could not  
372 detect all filaments in the image (low recall and high precision), but when foreground pixels were bright, APP resulted  
373 in overdetection of nodes (high recall and low precision). The main problem with APP comes from its oversegmen-  
374 tation and the existence of spurious branches in the final tracings, as observed in Figure 6(c). It appears that APP's  
375 approach to pruning nodes that are already covered by the nodes in the centreline of the filament is not successful  
376 in situations where the diameter of the filament is greater than a few pixels. APP2 is an upgraded version of APP  
377 and has greater precision and reduced processing time<sup>13</sup>. It initially reconstructs the filaments with a graph-based  
378 Fast Marching algorithm, therefore reducing the size of the initial reconstruction. APP2 adds the option of generating  
379 the initial reconstruction using a grey-weighted distance transform of the image. Our results for the image of the  
380 fungal mycelium show that its use (which corresponds to the APP2-2 tests) improves the tracing results in relation to  
381 APP2 without the grey-weighted distance transform. However, the greatest improvement comes from the use of Fast  
382 Marching, as it generates a leaner initial reconstruction, which facilitates further pruning steps. Nevertheless, APP2  
383 shares the same sensitivity to low contrast images as APP and fails to detect the entire filaments when they are dim.



384 FarSIGHT Snake<sup>14;15</sup>, which was the most robust method tested in this work, has advantages due to two main  
385 features: First, the use of Gradient Vector Flow (GVF) for both improved seed point detection and tracing (with an  
386 open active contour algorithm) and second, the implicit branch point detection. In the seed detection step, GVF is  
387 used to converge the initially detected seed points to points near the centreline of the filaments. Later, GVF is used as  
388 the snake external force of the open active contour algorithm. Despite its robustness, our results show that FarSIGHT  
389 Snake tracing was poor when filament intensities were dim. Also, FarSIGHT Snake has low precision values, due to a  
390 large number of spurious nodes in the final tracing, though this effect is smaller than in APP or Rivulet2. For instance,  
391 the number of nodes in high recall/low precision tests on the fungal mycelium image were approximately  $90 \cdot 10^3$  (test  
392 16),  $56 \cdot 10^3$  (test 22) and  $42 \cdot 10^3$  (test 7) for Rivulet2, APP, and FarSIGHT Snake, respectively.

393 Neutube<sup>19;20</sup> was a top performer for tests with both images. It uses a model-based approach followed by a  
394 graph-based connectivity to connect segments and resolve crossover regions. The model-based step detects filaments  
395 by fitting a 3D cylinder filter, modelled as a parameterized Laplacian of Gaussian. Then, a minimum cost spanning  
396 tree approach is used to connect segments and resolve branch points. The cost of edges between segments is cal-  
397 culated based on two principles: the distance between the nodes and the intensity of the voxels between the nodes.  
398 Crossovers are resolved, prior to joining segments, by computing angle changes of the end nodes of different segments  
399 (small changes in angle between two close segments will indicate that the two segments are connected). Our results  
400 show that the approach used by Neutube was robust to noise (in Figure 4 and 8, see the SNR and F1-scores in test 5:  
401 for both test images, SNR values are low but the F1-scores are high), yet sensitive to nonuniform foreground inten-  
402 sities (although less sensitive than NeuronStudio), dim filaments and short branches<sup>20</sup>. Such limitations are common  
403 to model-based (template matching of model fitting) local tracing methods such as that of Al-Kofahi *et al.*<sup>42</sup>.

404 The most recently published tracing method amongst the ones we tested is Rivulet2<sup>43;21</sup>. Its tracing is based on  
405 the multi-stencils fast marching method, which uses the binary distance transform of an oversegmented binary mask  
406 (with low threshold values) and further iterative back-tracing to detect branches. In our case Rivulet2 generated a  
407 huge number of nodes, therefore lowering precision values. When precision values were higher (for instance, test 18  
408 of the synthetic image) the final tracing only covered parts of the image (the recall of 0.102 shows that only a small  
409 fraction of the filaments was traced). A reduction in recall occurred in tests where there were discontinuities in the

410 filaments; these discontinuous filaments could not be connected by the tracing method and were later removed in the  
411 post-processing step (Rivulet2 only keeps the largest connected filament tree). However, Rivulet2 is a fast method  
412 and could be improved in case the number of nodes were reduced and the unconnected trees were kept.

413 A crucial point to note regarding the geometric scores we used is that the number of false positives used to  
414 calculate the F1-score and JSC is highly affected by the sampling difference between the number of nodes in the  
415 tracing result and the ground truth (Rivulet2 and APP show such a situation of a high number of false positives). Thus,  
416 it is important to visualise results carefully. For instance, upon qualitative visualisation, Rivulet2 traces the image  
417 of the fungal mycelium well, although its precision values are low due to oversegmentation. Such penalization of  
418 additional nodes could be minimized by reducing the number of nodes in the tracing graph by resampling in order to  
419 improve tracing results.

## 420 **Connectivity analysis**

421 The connectivity was evaluated qualitatively for the image of the fungal mycelium through visualisation of the tracing  
422 results since there was no connectivity information of a ground truth that would enable a quantitative evaluation.  
423 The visualisations showed that, for such a challenging dataset, even the best Neutube test (18) had connectivity er-  
424 rors, mainly crossover segments that were falsely connected. This was expected since there are regions with densely  
425 packed filaments where it is difficult to resolve whether or not they are independent segments. In addition, the fil-  
426 aments in the image come from more than a single source (i.e. they come from different spores) and, at this stage  
427 of fungal growth, it is impossible to determine the initial sources of the various filaments. For this reason, we also  
428 analysed the synthetic image, which is a single neuron tree with simpler connectivity. Figures 9(a-d) show that Neuron-  
429 Studio (Figure 9(b)) not only had a high F1-score but also correct connectivity. As the F1-score lowered, as seen with  
430 FarSIGHT Snake (Figure 9(c)) and Neutube (Figure 9(d)), incorrect topology appeared. With FarSIGHT Snake, isolated  
431 segments that should be connected were present in the results (yellow arrows), whereas with Neutube the centre of  
432 the image, from where all filaments originate, showed incorrect connectivity (yellow arrow). Although it appears that  
433 there is a relationship between F1-scores and the connectivity, a more detailed study would be required to evaluate  
434 the connectivity of the results. For future related works, we suggest the addition of a connectivity metric such as

4.35 DIADEM<sup>22</sup> or the NetMets<sup>44</sup> to enable a more detailed and definitive evaluation of the tracing methods based not  
4.36 solely on the geometrical accuracy and precision of the tracing results but also on the connectivity.

## 4.37 **4.2 | The factorial design approach allows for a detailed evaluation of image enhancement** 4.38 **and filament tracing methods**

### 4.39 **A systematic way of visualizing effects of factors and non-additive factor interactions**

4.40 Although factorial designs are commonly used to optimize outcomes of processes, our work represents the first time  
4.41 that a full factorial design has been used to support the evaluation of image analysis workflows. Factorial design  
4.42 approaches provide a more systematic way to analyse image analysis workflows, especially when several methods  
4.43 need to be evaluated, compared to the conventional preliminary testing and experimentation that is usually driven  
4.44 by the one-factor-at-a-time paradigm. Factorial design provides a mathematical model (Equation 2), the coefficients  
4.45 of which represent the individual effects of each factor (in this case, enhancement methods and their order in the  
4.46 workflow) on the image analysis outcome, as well as the effect of non-additive interactions between factors<sup>37</sup>. In our  
4.47 study, the use of a factorial design made it easier for us to identify important two-factor and three-factor interactions,  
4.48 for both images (Figure 7). For instance, the results of both images we tested show that the sum of the coefficients  
4.49 of two or more factor interactions represents more than half of the total sum of the coefficients, which indicates  
4.50 that these multi-factor interactions must be accounted for. In addition to indicating the existence of non-additive  
4.51 interaction effects, the model coefficients provide numerical values for the degree of influence of every factor and  
4.52 interaction on the outcome and show whether the effect is positive or negative, facilitating the interpretation of the  
4.53 image analysis results. For instance, a large negative coefficient value of FRA indicates that it should not be used  
4.54 before APP2.

4.55 Beyond that, we have proposed the use of chord graphs as an alternative to the classic Pareto plots. Chord graphs  
4.56 are more suitable in this situation, namely when four or more factors are investigated and a full factorial design is  
4.57 applied several times to test different outcomes, which, in this case, were F1-scores with different filament tracing  
4.58 methods. The chord graph has three advantages. First, the arc length of the chord graph allows a clear visualisation

of the degree of influence of each factor on all filament tracing methods in the same graph, whereas, in the case of Pareto plots, a different plot would be necessary for each method to convey the same information. Second, the relative degree of influence of the factors for each method is more clearly shown through the widths of the chords connected to the arcs. For instance, the chord widths in the median filtering factor in Figure 7 (a) show that median filtering is an important factor affecting the tracing scores of APP and APP2, but that this factor is less important for Farsight Snake. Third, in the chord graph, the positive and negative effects are clearly distinguished through the use of opaque colour for positive effects and transparent colour for negative effects. This is the first time that a chord diagram has been used for such purpose.

#### **The flexibility of factorial designs and their use for both screening important variables as well as fine optimization of the image analysis results**

Our work describes the use of a full factorial design to evaluate two-level categorical factors: the use (or not) of the selected enhancement methods. However, a full factorial design could also be applied in situations where numerical parameters within the enhancement methods could be optimized or with a mixture of categorical and numerical variables. For instance, tests could be done by treating the following parameters as factors to be optimized: the standard deviation of the median filter kernel, the number of scales in which Gaussian convolution is performed in Frangi vessel enhancement or even the number of iterations and tolerance of the deconvolution process. Of course, there are other manners to perform such optimization. For example, Xu *et al.*<sup>38</sup> propose the optimization of two tracing parameters through the minimization of an F-function by testing 25 different values of one parameter and 20 values of another parameter, resulting in 500 tracing tests. However, their approach may become infeasible when the range of values or the number of parameters to be optimized is higher. A factorial design approach may be more appropriate, because it uses fewer tests. For instance, if a two-factor central composite design were used in the same case presented by Xu *et al.*<sup>38</sup>, it would be possible to reduce the number of tests to multiples of 11, likely two or three times, if the starting factor levels were well selected.

Factorial designs can be used for screening or optimization<sup>37</sup>. In a screening design, it is common to have many factors (e.g. five or more factors in an image analysis study) to be tested and the aim is to detect the most relevant

484 factors so that they can be further studied, but without performing too many experiments, due to time or cost con-  
485 straints. Thus, screening experimental designs would be fractional factorial designs or, possibly, more specialized  
486 designs, such as the Plackett-Burman design. For example, 11 factors could be evaluated with 12 tests in a Plackett-  
487 Burman design, or a  $2^{6-2}$  fractional factorial design could evaluate 6 two-level factors with 16 tests. In our study,  
488 we did not do a classical screening study since we evaluated the chosen factors beforehand and found them to be  
489 relevant. In addition, we identified fairly good values for the parameters within the chosen enhancement methods  
490 prior to applying the factorial design. Also, there were no time or cost constraints: each of our tests was completed  
491 in less than 10 minutes using a laptop computer (Intel® quad core processor 1.8 GHz, 16Gb RAM DDR4, GeForce  
492 MX150 4Gb graphics card) and with free and open source image analysis platforms. With 32 tests, we were able to  
493 analyse 5 factors, whereas if an approach similar to that of Xu *et al.* were used, the number of tests could easily reach  
494 hundreds of thousands of tests, thus potentially making the analysis infeasible.

495 In an optimization design, fewer factors are analysed, usually two or three (previously selected through screening),  
496 but with more than two levels. The additional levels are included to evaluate non-linear behaviour of the system being  
497 studied and thereby obtain a more accurate model prediction of the outcome. The central composite design is widely  
498 used for such purposes and it guides researchers towards a minimum or maximum value of the outcome within the  
499 ranges chosen for the factors considered<sup>37:39</sup>.

500 In summary, our work is a blend of both types of factorial design, for two main reasons. First, we chose to conduct  
501 a complete (full) factorial design because the chosen factors were already identified as being relevant to the tracing  
502 results and there were no time or cost constraints. Second, the tests evaluated categorical variables (the use or not  
503 of each enhancement method) with the main goal of evaluating the effect of each factor on the F1-score.

#### 504 **Usefulness of JSC, F1-score, SNR and SSIM**

505 Researchers are usually interested in evaluating two criteria when tracing filaments: the geometric accuracy of the  
506 segmentation and the accuracy of the topology of the detected filaments (connectivity). We used the F1-score and  
507 the JSC for evaluating geometric accuracy of the detected filaments. The JSC has been previously used in a thorough  
508 comparison of particle tracking methods<sup>23</sup>, whereas the F1-score is commonly used to compare machine learning

509 methods<sup>40</sup>, but these metrics were never used in the present context. Given spatial tolerances in the x, y and z  
510 coordinates, these values can be easily computed. The F1-score and the JSC were chosen because obtaining an  
511 accurate ground truth of the filamentous network of the fungal mycelium was made impossible by the poor quality  
512 of the image in some regions: for example, images with blurred filaments in z stacks farther away from the detector  
513 (that is, deeper within the sample, say,  $z > 50$ ) and the existence of regions of densely packed filaments. Thus, we  
514 used the alternative approach of defining a point set ground truth in order to evaluate the accuracy of the geometric  
515 segmentation. We implemented the score computations both in Matlab® and Python and they are made available  
516 through public code repositories.

517 SNR is used to measure the degree of noise in an image. In our enhancement tests, we observed that some  
518 combinations of enhancement methods gave images of poorer quality (lower SNR) compared to the deconvolved  
519 image (Test 2). However, there were images with low SNR which did not show particular changes in noise levels due to  
520 the enhancement operations in relation to the deconvolved image, but had changes in the structural information in the  
521 image (for example connected filaments appeared disconnected). Thus, we also included the SSIM in our calculations,  
522 thereby evaluating changes in quality in more detail, not only with a quality parameter based on noise. In addition, we  
523 noted a counterintuitive case when either the SNR or SSIM are compared with the F1-score or other tracing scores (e.g.  
524 recall and precision): An increase in the SNR or SSIM of an enhanced image does not necessarily result in higher F1-  
525 scores, that is, we did not see any strong correlation between the SNR and the F1-score (see Supplementary Material  
526 Figures S1.5-8). This is interesting because, in image analysis, there is a common sense idea that, after an image is  
527 enhanced, it would more likely facilitate further segmentation steps and improve results. Our tests did not confirm this  
528 idea. However, we saw weak correlations between SSIM and the F1-score for some of the tracing methods, which  
529 shows that structural changes (disappearance of filament features, for example) in the image relate more easily to  
530 lower F1-score values compared to the SNR, even though such correlation is still weak. As a consequence, the use of  
531 only the SNR and SSIM to select enhancement methods is misleading. For example, for the fungal image, the highest  
532 F1-score achieved was obtained in test 18, whose SNR or SSIM values are not the highest, even though they are the  
533 third highest. Therefore, it is advisable to select enhancement methods with a complete image analysis workflow and  
534 based on geometric accuracy scores (e.g. F1 and JSC) instead of using only image quality parameters (SNR and SSIM).

535 Ultimately, the SNR and SSIM are measurements that help in the evaluation of the result but are not as important as  
536 the F1-score.

### 537 **The choice of the image enhancement workflow and tracing method**

538 The chord graph in Figure 7 and the F1-scores enabled us to choose the most appropriate combination of image  
539 enhancement methods to be used prior to tracing the filaments for each of the six filament tracing methods. With the  
540 image of the fungal mycelium, the two best combinations were those of test 18 (deconvolution followed by median  
541 filtering) when Neutube was used or of test 23 (Background subtraction, followed by pixel intensity normalization  
542 and median filtering) when NeuronStudio was used. In contrast, the two best combinations for the synthetic image  
543 were those of test 2 (deconvolution) when NeuronStudio was used and of test 7 (background subtraction followed  
544 by pixel intensity normalization) when FarSIGHT Snake was used. Thus, we have not necessarily identified a general  
545 combination of enhancement methods and a tracing method that will always be optimal. The optimal combination  
546 will be image-specific, in the sense that it will depend on the quality of the original images. If the image used in the  
547 factorial design tests has a quality that is representative of the quality of the images to be processed, then one can  
548 assume that the selected combination of methods (image enhancement and tracing method) is the most appropriate.  
549 However, even when a new image to be processed does not have the same quality or filament characteristics as the  
550 tested images, our results can still guide the choice of the tracing method. This is true because we tested the tracing  
551 methods with 62 preprocessed images of quite different qualities and this allowed us to check for the robustness  
552 of the tracing methods. For instance, either FarSIGHT Snake or Neutube could be tested first in any cases, due to  
553 their robustness to changes in image quality. This robustness is attested by two results: First, FarSIGHT Snake and  
554 Neutube gave the highest mean F1-scores (0.548 and 0.685 for the image of the fungal mycelium, 0.737 and 0.682 for  
555 the synthetic image, for FarSIGHT Snake and Neutube, respectively) but also quite low standard deviations of F1-score  
556 values: the arc lengths of FarSIGHT Snake and Neutube in the chord graphs of Figure 7 show that their scores are  
557 not highly affected by the different enhancement methods used. This also leads to another conclusion: some tracing  
558 methods may require tracing tests with different image enhancement methods while other tracing methods may not  
559 require such tests. This is the case of FarSIGHT Snake and Neutube: they may give good tracing results even if the

560 image is not enhanced.

### 561 **4.3 | Testing new tracing methods for a broad range of image qualities and filament char-** 562 **acteristics is crucial**

563 Although the results presented are extensive, this is not a definitive benchmark study of image enhancement meth-  
564 ods or filament tracing methods. The analysis of the factorial design results for the F1-score show that, although  
565 similar F1-score patterns were obtained for both the image of the fungal mycelium and the synthetic image, images  
566 of different qualities and different filament features could give significant differences in tracing results. For example,  
567 the performance of APP2 was strikingly different from that of NeuronStudio. These large variations in performance  
568 would not be detected in situations where a small dataset is used. Our dataset, despite originating from only two  
569 images, was expanded because the image enhancement operations generated 62 output images of varying quality  
570 (i.e. wide range of SNR). When new tracing methods are reported, this is usually done with a smaller number of test  
571 images, although an analysis of recent papers shows that the size of test datasets is increasing. For instance, APP was  
572 tested with six images: two raw images with different filament characteristics and four where one of the raw images  
573 was processed to have different levels of noise (with the use of random bright voxel deletion)<sup>12</sup>. The first publication  
574 about NeuronStudio tested only one image, although it was stated that it was being used in other publications<sup>18</sup>. In  
575 the first Neutube paper, the tracing method was used to trace 32 neurons within a single image (filaments with the  
576 same characteristics)<sup>19;45</sup>. In contrast, APP2 was initially tested on the DIADEM dataset of fruitfly neurons<sup>46</sup>, the  
577 flycircuit.org database, the Janelia fly imagery database and other challenging datasets<sup>13</sup>. FarSIGHT Snake was tested  
578 on the whole DIADEM dataset<sup>14;15</sup> as it was part of the DIADEM challenge and Rivulet2 was tested on both the OP  
579 dataset of DIADEM (8 images) and 114 neurons of the BigNeuron dataset<sup>21</sup>. Over the years, filament tracing meth-  
580 ods have been tested more extensively, using images with different SNR and artefacts as well as images of different  
581 modalities (e.g. from confocal and brightfield microscopy)<sup>14</sup>. Based on our results, we encourage researchers who  
582 are developing new filament tracing methods to include not only test images of different modalities but also tests  
583 on images with different filament densities, for example, densely branched or sparse trees, and even different types



584 of filaments, such as was done by Gonzalez et al.<sup>47</sup>, who included images of blood vessels, neurons and even road  
585 networks as their test datasets. Other researchers have raised similar concerns in areas where complex networks of  
586 filaments are studied, such as plant biology and neurobiology<sup>2;14</sup>. This way, the new methods may prove their broad  
587 applicability and stimulate discussions on their strengths and weaknesses.

## 588 5 | CONCLUSION

589 In the present work, we took the challenging problem of filament tracing and evaluated different image enhancement  
590 methods and filament tracing methods through factorial designs with two images: a 3D image of a complex fungal  
591 mycelium and a 3D synthetic image of a neuronal tree. We have shown that factorial designs are powerful tools to  
592 help researchers evaluate image analysis workflows. One may choose to investigate the effects of different workflows,  
593 evaluating the results using either image quality parameters (SNR, SSIM for instance) or quantitative scores related  
594 to the image analysis problem at hand (e.g. F1-score and JSC). Regardless of the outcome chosen for the evaluation,  
595 the model that results from the factorial design gives a comprehensive analysis of the effects of the tested factors  
596 on the chosen outcome. Without an analysis of all factors simultaneously (image enhancement and tracing methods)  
597 the analysis could lead to sub-optimal results. Thus, our work gives readers an insight into the potential of the use  
598 of factorial designs in image analysis. We also identified opportunities for future extension of this work in order  
599 to explore factorial designs further and to improve the benchmarking of filament tracing methods. With respect to  
600 factorial designs, we suggest the use of a screening study followed by an optimization with other types of factorial  
601 designs, for example, the Plackett-Burman and central composite designs for screening and optimization, respectively.

602 Our results also show the importance of testing filament tracing workflows not only with images of different  
603 modalities, different noise and artefact levels but also with a broad range of filament characteristics (e.g. images  
604 densely populated with filaments or containing different sized filaments). If future filament tracing methods are more  
605 exhaustively tested from their conception, we believe their applicability, strengths and weaknesses may be discussed  
606 more openly and this will ensure that they are implemented and used by scientific community. Furthermore, we

607 suggest that new benchmarking studies should include quantitative connectivity metrics to complement the analysis  
608 and provide more definitive benchmarking results.

## 609 **Acknowledgements**

610 This research was supported by a "Universal" Grant, project number 406247/2016-1, from CNPq (Conselho Nacional  
611 de Desenvolvimento Científico e Tecnológico), a Brazilian government agency for the advancement of science and  
612 technology, and also by an ERANet-LAC Grant (ELAC2015\_T03-0579), administered by CNPq through project number  
613 443208/2016-6 . Research scholarships were granted to David Mitchell and Maura Sugai-Guérios by CNPq, and to  
614 Leandro Scholz by CAPES (Coordenação de Aperfeiçoamento de Pessoal de Nível Superior), a Brazilian government  
615 agency for the development of personnel in higher education. The postgraduate program in Chemical Engineering  
616 of UFPR is financed by CAPES (Finance Code 001). The authors would like to thank members of the Laboratory  
617 of Enzyme and Fermentation Technology and the Laboratory of Enzyme Technology and Biocatalysis for the help in  
618 generating the ground-truth and Sébastien Tosi (IRB Barcelona) for helpful discussions.

## 619 **Conflict of interest**

620 The authors declare that they have no competing financial interests.

## 621 **references**

- 622 [1] Bonnet N. Multivariate statistical methods for the analysis of microscope image series: applications in materials science.  
623 *Journal of Microscopy* 1998;190(1-2):2-18. [https://onlinelibrary.wiley.com/doi/abs/10.1046/j.1365-2818.1998.](https://onlinelibrary.wiley.com/doi/abs/10.1046/j.1365-2818.1998.3250876.x)  
624 3250876 . x.
- 625 [2] Fricker MD, Moger J, Littlejohn GR, Deeks MJ. Making microscopy count: quantitative light microscopy of dynamic  
626 processes in living plants. *Journal of Microscopy* 2016;263(2):181-191. [https://onlinelibrary.wiley.com/doi/abs/](https://onlinelibrary.wiley.com/doi/abs/10.1111/jmi.12403)  
627 10.1111/jmi.12403.

- 628 [3] Meijering E, Carpenter AE, Peng H, Hamprecht FA, Olivo-Marin JC. Imagining the future of bioimage analysis. *Nature*  
629 *Biotechnology* 2016 Dec;34(12):1250–1255. <https://www.nature.com/articles/nbt.3722>.
- 630 [4] Scholz LA. Tracing biofilaments from images : analysis of existing methods to quantify the three-dimensional growth of  
631 filamentous fungi on solid substrates. PhD thesis, Universidade Federal do Paraná; 2018.
- 632 [5] Rubens U, Mormont R, Baecker V, Michiels G, Paavolainen L, Ball G, et al. BIAFLOWS: A collaborative framework to  
633 benchmark bioimage analysis workflows;p. 707489. <https://www.biorxiv.org/content/10.1101/707489v1>.
- 634 [6] Meijering E. Neuron tracing in perspective. *Cytometry Part A* 2010 mar;77A(7):693–704. [http://doi.wiley.com/10.](http://doi.wiley.com/10.1002/cyto.a.20895)  
635 [1002/cyto.a.20895](http://doi.wiley.com/10.1002/cyto.a.20895).
- 636 [7] Donohue DE, Ascoli GA. Automated reconstruction of neuronal morphology: An overview. *Brain Research Reviews*  
637 2011;67(1):94–102.
- 638 [8] Acciai L, Soda P, Iannello G. Automated Neuron Tracing Methods: An Updated Account. *Neuroinformatics* 2016  
639 Oct;14(4):353–367. <http://link.springer.com/10.1007/s12021-016-9310-0>, publisher: Springer US.
- 640 [9] Wang Z, Bovik AC, Sheikh HR, Simoncelli EP. Image Quality Assessment: From Error Visibility to Structural Similarity.  
641 *IEEE Transactions on Image Processing* 2004 apr;13(4):600–612. <http://ieeexplore.ieee.org/document/1284395/>.
- 642 [10] Sheppard CJR, Gan X, Gu M, Roy M. Signal-to-Noise Ratio in Confocal Microscopes. In: *Handbook Of Biological*  
643 *Confocal Microscopy* Boston, MA: Springer US; 2006.p. 442–452. [http://link.springer.com/10.1007/978-0-387-](http://link.springer.com/10.1007/978-0-387-45524-2_{\_}22)  
644 [45524-2{\\\_}22](http://link.springer.com/10.1007/978-0-387-45524-2_{\_}22).
- 645 [11] Sheppard CJR, Gu M, Roy M. Signal-to-noise ratio in confocal microscope systems. *Journal of Microscopy* 1992  
646 dec;168(3):209–218. <http://doi.wiley.com/10.1111/j.1365-2818.1992.tb03264.x>.
- 647 [12] Peng H, Long F, Myers G. Automatic 3D neuron tracing using all-path pruning. *Bioinformatics* 2011 jul;27(13):i239–i247.
- 648 [13] Xiao H, Peng H. APP2: automatic tracing of 3D neuron morphology based on hierarchical pruning of a gray-weighted  
649 image distance-tree. *Bioinformatics* 2013 jun;29(11):1448–1454.
- 650 [14] Wang Y, Narayanaswamy A, Tsai CL, Roysam B. A Broadly Applicable 3-D Neuron Tracing Method Based on Open-Curve  
651 Snake. *Neuroinformatics* 2011 sep;9(2-3):193–217.
- 652 [15] Narayanaswamy A, Wang Y, Roysam B. 3-D Image Pre-processing Algorithms for Improved Automated Tracing of Neu-  
653 ronal Arbors. *Neuroinformatics* 2011 sep;9(2-3):219–231.

- 654 [16] Wearne SL, Rodriguez A, Ehlenberger DB, Rocher AB, Henderson SC, Hof PR. New techniques for imaging, digitization  
655 and analysis of three-dimensional neural morphology on multiple scales. *Neuroscience* 2005 jan;136(3):661–680.
- 656 [17] Rodriguez A, Ehlenberger DB, Dickstein DL, Hof PR, Wearne SL. Automated Three-Dimensional Detection and Shape  
657 Classification of Dendritic Spines from Fluorescence Microscopy Images. *PLoS ONE* 2008 apr;3(4):1–12.
- 658 [18] Rodriguez A, Ehlenberger DB, Hof PR, Wearne SL. Three-dimensional neuron tracing by voxel scooping. *Journal of*  
659 *Neuroscience Methods* 2009 oct;184(1):169–175.
- 660 [19] Feng L, Zhao T, Kim J. neuTube 1.0: a New Design for Efficient Neuron Reconstruction Software Based on the SWC  
661 Format. *eNeuro* 2015; <http://www.eneuro.org/content/early/2015/01/02/ENEURO.0049-14.2014>.
- 662 [20] Zhao T, Xie J, Amat F, Clack N, Ahammad P, Peng H, et al. Automated Reconstruction of Neuronal Morphology Based  
663 on Local Geometrical and Global Structural Models. *Neuroinformatics* 2011 sep;9(2-3):247–261.
- 664 [21] Liu S, Zhang D, Song Y, Peng H, Cai W. Automated 3D Neuron Tracing with Precise Branch Erasing and Confidence  
665 Controlled Back-Tracking. *IEEE Transactions on Medical Imaging* 2018;p. 1–1. <https://ieeexplore.ieee.org/document/8354803/>.  
666
- 667 [22] Gillette TA, Brown KM, Ascoli GA. The DIADEM metric: comparing multiple reconstructions of the same neuron. *Neu-*  
668 *roinformatics* 2011 sep;9(2-3):233–45. <http://www.ncbi.nlm.nih.gov/pubmed/21519813><http://www.pubmedcentral.nih.gov/articlerender.fcgi?artid=PMC4339018>.
- 670 [23] Chenouard N, Smal I, de Chaumont F, Maška M, Sbalzarini IF, Gong Y, et al. Objective comparison of particle tracking  
671 methods. *Nature Methods* 2014 jan;11(3):281–289. <http://www.nature.com/doifinder/10.1038/nmeth.2808>.
- 672 [24] Sugai-Guérios MH. Understanding the growth of hyphae of filamentous fungi on the surfaces of solid media through  
673 computational models and confocal microscopy. PhD thesis, Federal University of Santa Catarina; 2016.
- 674 [25] Kirshner H, Aguer F, Sage D, Unser M. 3-D PSF fitting for fluorescence microscopy: implementation and localization  
675 application. *Journal of Microscopy* 2013 jan;249(1):13–25. <http://doi.wiley.com/10.1111/j.1365-2818.2012.03675.x>.  
676
- 677 [26] Sage D, Donati L, Soulez F, Fortun D, Schmit G, Seitz A, et al. DeconvolutionLab2: An open-source software for  
678 deconvolution microscopy. *Methods* 2017 feb;115:28–41. <https://www.sciencedirect.com/science/article/pii/S1046202316305096?via=ihub>.  
679

- 680 [27] Sternberg SR. Biomedical Image Processing. *Computer* 1983 jan;16(1):22–34. [http://ieeexplore.ieee.org/document/](http://ieeexplore.ieee.org/document/1654163/)  
681 1654163/.
- 682 [28] Frangi AF, Niessen WJ, Vincken KL, Viergever MA. Multiscale vessel enhancement filtering. In: WELLS WM, COLCH-  
683 ESTER A, DELP S, editors. *Medical Image Computing and Computer-Assisted Intervention – MICCAI'98. MICCAI 1998.*  
684 *Lecture Notes in Computer Science*, vol 1496 Springer Berlin Heidelberg; 1998,p. 130–137. [http://link.springer.](http://link.springer.com/10.1007/BFb0056195)  
685 [com/10.1007/BFb0056195](http://link.springer.com/10.1007/BFb0056195).
- 686 [29] Schindelin J, Arganda-Carreras I, Frise E, Kaynig V, Longair M, Pietzsch T, et al. Fiji: an open-source platform for biological-  
687 image analysis. *Nature Methods* 2012 jul;9(7):676–682. <http://www.nature.com/articles/nmeth.2019>.
- 688 [30] Castle M, Keller J, Rolling Ball Background Subtraction implementation; 2007. [http://imagej.net/plugins/rolling-](http://imagej.net/plugins/rolling-ball.html)  
689 [ball.html](http://imagej.net/plugins/rolling-ball.html).
- 690 [31] Cuntz H, Forstner F, Borst A, Häusser M. One Rule to Grow Them All: A General Theory of Neuronal Branching and  
691 Its Practical Application. *PLOS Computational Biology* 2010 08;6(8):1–14. [https://doi.org/10.1371/journal.pcbi.](https://doi.org/10.1371/journal.pcbi.1000877)  
692 [1000877](https://doi.org/10.1371/journal.pcbi.1000877).
- 693 [32] Peng H, Ruan Z, Atasoy D, Sternson S. Automatic reconstruction of 3D neuron structures using a graph-augmented  
694 deformable model. *Bioinformatics* 2010 jun;26(12):i38–i46.
- 695 [33] Schindelin J, Meijering E, RandomJ; 2014. <https://imagescience.org/meijering/software/randomj/>.
- 696 [34] Dinno A, Package 'dunn.test'; 2017. <https://cran.rstudio.com/web/packages/dunn.test/dunn.test.pdf>.
- 697 [35] Peng H, Ruan Z, Long F, Simpson JH, Myers EW. V3D enables real-time 3D visualization and quantitative analysis  
698 of large-scale biological image data sets. *Nature Biotechnology* 2010 apr;28(4):348–353. [http://www.nature.com/](http://www.nature.com/doifinder/10.1038/nbt.1612)  
699 [doifinder/10.1038/nbt.1612](http://www.nature.com/doifinder/10.1038/nbt.1612).
- 700 [36] Gu Z, Gu L, Eils R, Schlesner M, Brors B. circlize implements and enhances circular visualization in R. *Bioinformatics* 2014  
701 Oct;30(19):2811–2812. [https://academic.oup.com/bioinformatics/article-lookup/doi/10.1093/bioinformatics/](https://academic.oup.com/bioinformatics/article-lookup/doi/10.1093/bioinformatics/btu393)  
702 [btu393](https://academic.oup.com/bioinformatics/article-lookup/doi/10.1093/bioinformatics/btu393).
- 703 [37] Box GEP, Hunter JS, Hunter WG. *Statistics for experimenters: design, innovation, and discovery*. 2 ed. Wiley series in  
704 probability and statistics, Wiley-Interscience; 2005.
- 705 [38] Xu T, Vavylonis D, Tsai FC, Koenderink GH, Nie W, Yusuf E, et al. SOAX: A software for quantification of 3D biopolymer  
706 networks. *Scientific Reports* 2015 mar;5:9081.

- 707 [39] Myers RH, Montgomery DC. Response surface methodology: process and product optimization using designed experi-  
708 ments. Wiley series in probability and statistics: Applied probability and statistics, Wiley; 1995. <https://books.google.com.br/books?id=7xvvAAAAAAAJ>.
- 710 [40] Caicedo JC, Roth J, Goodman A, Becker T, Karhohs KW, Broisin M, et al. Evaluation of Deep Learning Strategies for  
711 Nucleus Segmentation in Fluorescence Images. *bioRxiv* 2019; <https://www.biorxiv.org/content/early/2019/02/06/335216>.
- 713 [41] Obara B, Fricker M, Gavaghan D, Grau V. Contrast-Independent Curvilinear Structure Detection in Biomedical Im-  
714 ages. *IEEE Transactions on Image Processing* 2012 May;21(5):2572–2581. <http://ieeexplore.ieee.org/document/6140570/>.
- 716 [42] Al-Kofahi KA, Lasek S, Szarowski DH, Pace CJ, Nagy G, Turner JN, et al. Rapid automated three-dimensional tracing of  
717 neurons from confocal image stacks. *IEEE Transactions on Information Technology in Biomedicine* 2002 jun;6(2):171–  
718 187.
- 719 [43] Liu S, Zhang D, Liu S, Feng D, Peng H, Cai W. Rivulet: 3D Neuron Morphology Tracing with Iterative Back-Tracking.  
720 *Neuroinformatics* 2016 oct;14(4):387–401. <http://link.springer.com/10.1007/s12021-016-9302-0>.
- 721 [44] Mayerich D, Bjornsson C, Taylor J, Roysam B. NetMets: software for quantifying and visualizing errors in biological  
722 network segmentation. *BMC Bioinformatics* 2012 13:8 2012;13(8):1–19.
- 723 [45] Druckmann S, Feng L, Lee B, Yook C, Zhao T, Magee JC, et al. Structured Synaptic Connectivity between Hippocampal Re-  
724 gions. *Neuron* 2014 Feb;81(3):629–640. <http://www.sciencedirect.com/science/article/pii/S0896627313010945>.
- 725 [46] Brown KM, Barrionuevo G, Canty AJ, De Paola V, Hirsch JA, Jefferis GS, et al. The DIADEM data sets: representative  
726 light microscopy images of neuronal morphology to advance automation of digital reconstructions. *Neuroinformatics*  
727 2011;9(2-3):143–157.
- 728 [47] Gonzalez G, Fleurety F, Fua P. Learning rotational features for filament detection. In: 2009 IEEE Conference on Computer  
729 Vision and Pattern Recognition IEEE; 2009. p. 1582–1589.

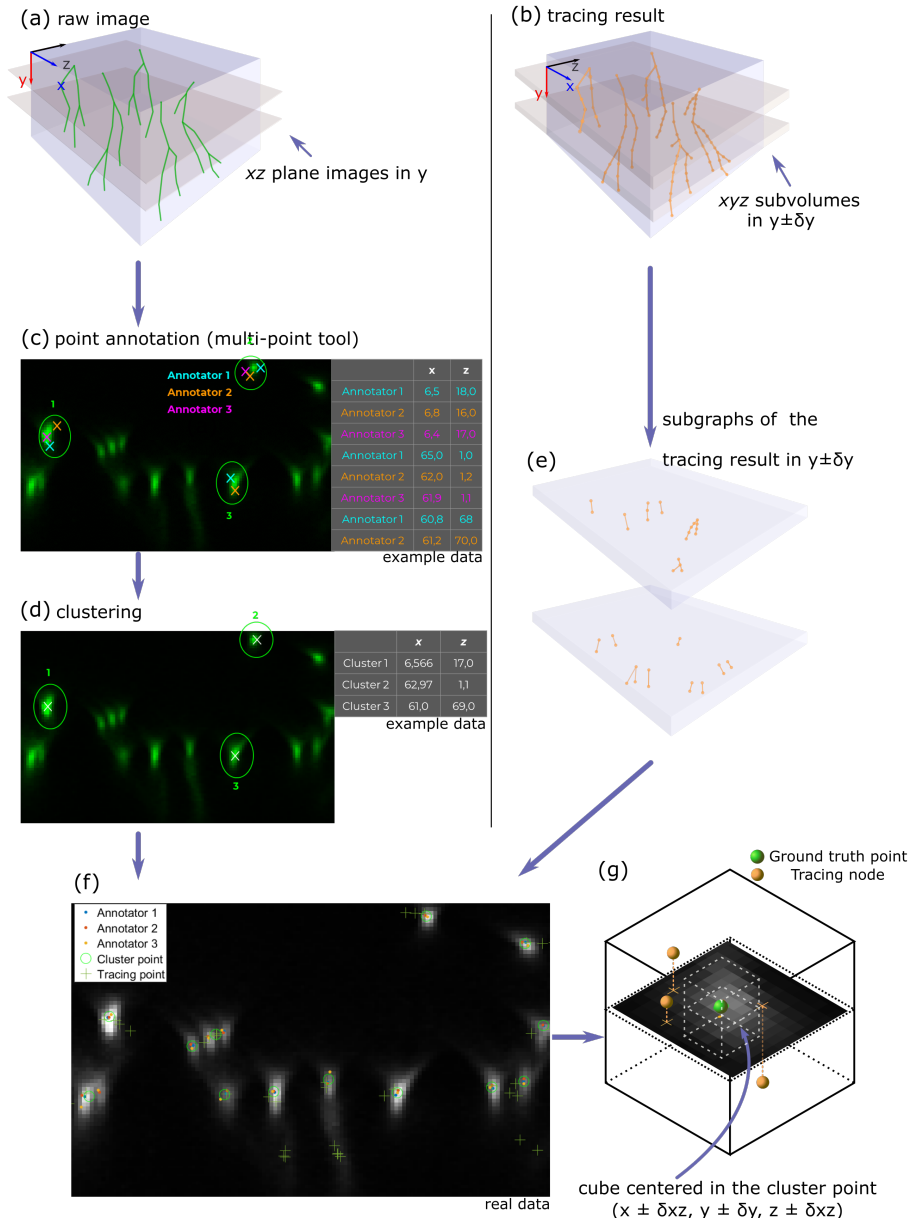

**FIGURE 3** Schematic representation of the construction of the ground truth annotation and the calculation of the score. (a) representation of the raw image in three dimensions, from which images of the  $xz$  plane were extracted in various values of the  $y$  coordinate. (b) representation of the tracing result obtained from a filament tracing method. (c) sample image and example of point annotations on an image of the  $xz$ -plane. Each annotator determined where filament segments are located and selected a point in that region with the ImageJ multi-point tool. Then, (d) cluster points, whose coordinates are the average of a number of the closest annotated points (using euclidean distance) were determined. The maximum number of cluster points used was the maximum number of annotated points determined by any of the annotators. In order to calculate the scores, (e) subgraphs of the tracing result are extracted from the swc tracing file, where the minimum and maximum  $y$  coordinates of such subgraphs are determined by the parameters  $\delta_y$  and the  $y$  coordinate of the  $xz$  plane of each annotated image as  $y \pm \delta_y$ . Finally, the subgraphs and the cluster points are matched to calculate the scores. (f) shows an example of the data. The scores were calculated by determining a cubic region as shown in (g), where a cluster point is centered and the cube has bounds  $(x \pm \delta_{xz}, y \pm \delta_y, z \pm \delta_{xz})$ . If there is at least one trace point within the region of the cube, the cluster point has a true positive tracing point, otherwise it has a false negative. The same procedure is done to the tracing points to determine the number of false positives.

| Test number        | Deconv | BS | Norm | Fra | Med | SNR*  | SSIM* | Recall |       |                     |                |              | Precision |                        |          |       |       |                     |                |              |         |                        |          |       |
|--------------------|--------|----|------|-----|-----|-------|-------|--------|-------|---------------------|----------------|--------------|-----------|------------------------|----------|-------|-------|---------------------|----------------|--------------|---------|------------------------|----------|-------|
|                    |        |    |      |     |     |       |       | APP    | APP2  | APP2-2 <sup>2</sup> | FarsIGHT Snake | NeuronStudio | Neutube   | Neutube-2 <sup>3</sup> | Rivulet2 | APP   | APP2  | APP2-2 <sup>2</sup> | FarsIGHT Snake | NeuronStudio | Neutube | Neutube-2 <sup>3</sup> | Rivulet2 |       |
| 1                  | -1     | -1 | -1   | -1  | -1  | 2.09  | 0.667 | 0.824  | 0.577 | 0.549               | 0.808          | 0.895        | 0.927     | 0.853                  | 0.290    | 1.179 | 0.712 | 0.683               | 0.427          | 0.507        | 0.623   | 0.655                  | 0.086    |       |
| 2 <sup>1</sup>     | -1     | -1 | -1   | -1  | -1  | ∞     | 1.000 | 0.756  | 0.582 | 0.528               | 0.793          | 0.884        | 0.882     | 0.806                  | 0.691    | 0.189 | 0.752 | 0.729               | 0.422          | 0.507        | 0.625   | 0.665                  | 0.203    |       |
| 3                  | -1     | -1 | -1   | -1  | -1  | 6.64  | 0.877 | 0.791  | 0.576 | 0.572               | 0.800          | 0.856        | 0.925     | 0.596                  | 0.256    | 0.732 | 0.717 | 0.438               | 0.532          | 0.655        | 0.658   | 0.141                  |          |       |
| 4                  | -1     | -1 | -1   | -1  | -1  | 21.60 | 0.956 | 0.753  | 0.541 | 0.528               | 0.805          | 0.826        | 0.891     | 0.811                  | 0.754    | 0.193 | 0.760 | 0.730               | 0.420          | 0.538        | 0.628   | 0.671                  | 0.233    |       |
| 5                  | -1     | -1 | -1   | -1  | -1  | -3.83 | 0.489 | 0.897  | 0.662 | 0.594               | 0.897          | 0.843        | 0.941     | 0.869                  | 0.323    | 0.089 | 0.593 | 0.656               | 0.414          | 0.535        | 0.621   | 0.655                  | 0.054    |       |
| 6                  | -1     | -1 | -1   | -1  | -1  | 1.60  | 0.824 | 0.863  | 0.663 | 0.712               | 0.901          | 0.854        | 0.846     | 0.929                  | 0.572    | 0.115 | 0.616 | 0.579               | 0.411          | 0.482        | 0.453   | 0.414                  | 0.056    |       |
| 7                  | -1     | -1 | -1   | -1  | -1  | -1.32 | 0.760 | 0.866  | 0.662 | 0.632               | 0.911          | 0.884        | 0.960     | 0.889                  | 0.412    | 0.166 | 0.633 | 0.648               | 0.421          | 0.519        | 0.604   | 0.647                  | 0.076    |       |
| 8                  | -1     | -1 | -1   | -1  | -1  | 1.91  | 0.835 | 0.847  | 0.644 | 0.667               | 0.896          | 0.842        | 0.938     | 0.928                  | 0.716    | 0.126 | 0.667 | 0.634               | 0.401          | 0.510        | 0.442   | 0.398                  | 0.099    |       |
| 9                  | -1     | -1 | -1   | -1  | -1  | 1.43  | 0.686 | 0.000  | 0.301 | 0.389               | 0.624          | 0.297        | 0.819     | 0.804                  | 0.674    | 0.000 | 0.714 | 0.710               | 0.444          | 0.520        | 0.676   | 0.673                  | 0.290    |       |
| 10                 | -1     | -1 | -1   | -1  | -1  | 1.54  | 0.674 | 0.000  | 0.265 | 0.391               | 0.571          | 0.210        | 0.783     | 0.692                  | 0.633    | 0.000 | 0.751 | 0.802               | 0.429          | 0.371        | 0.623   | 0.667                  | 0.281    |       |
| 11                 | -1     | -1 | -1   | -1  | -1  | 1.43  | 0.687 | 0.386  | 0.310 | 0.399               | 0.600          | 0.284        | 0.826     | 0.724                  | 0.675    | 0.621 | 0.731 | 0.745               | 0.476          | 0.503        | 0.653   | 0.685                  | 0.291    |       |
| 12                 | -1     | -1 | -1   | -1  | -1  | 1.51  | 0.673 | 0.000  | 0.251 | 0.398               | 0.581          | 0.248        | 0.794     | 0.683                  | 0.647    | 0.000 | 0.768 | 0.752               | 0.434          | 0.553        | 0.634   | 0.667                  | 0.274    |       |
| 13                 | -1     | -1 | -1   | -1  | -1  | 2.28  | 0.730 | 0.000  | 0.391 | 0.457               | 0.722          | 0.316        | 0.770     | 0.679                  | 0.781    | 0.000 | 0.756 | 0.746               | 0.461          | 0.490        | 0.650   | 0.692                  | 0.278    |       |
| 14                 | -1     | -1 | -1   | -1  | -1  | 3.08  | 0.737 | 0.000  | 0.000 | 0.000               | 0.664          | 0.203        | 0.803     | 0.849                  | 0.744    | 0.000 | 0.000 | 0.000               | 0.000          | 0.449        | 0.504   | 0.665                  | 0.641    | 0.284 |
| 15                 | -1     | -1 | -1   | -1  | -1  | 2.32  | 0.738 | 0.541  | 0.408 | 0.489               | 0.723          | 0.357        | 0.913     | 0.822                  | 0.230    | 0.616 | 0.763 | 0.750               | 0.463          | 0.498        | 0.655   | 0.700                  | 0.176    |       |
| 16                 | -1     | -1 | -1   | -1  | -1  | 3.06  | 0.735 | 0.000  | 0.000 | 0.000               | 0.677          | 0.200        | 0.910     | 0.869                  | 0.786    | 0.000 | 0.000 | 0.000               | 0.465          | 0.540        | 0.643   | 0.668                  | 0.274    |       |
| 17                 | -1     | -1 | -1   | -1  | -1  | 2.10  | 0.658 | 0.748  | 0.504 | 0.442               | 0.704          | 0.744        | 0.782     | 0.702                  | 0.322    | 0.321 | 0.736 | 0.717               | 0.458          | 0.577        | 0.668   | 0.697                  | 0.082    |       |
| 18                 | -1     | -1 | -1   | -1  | -1  | 7.10  | 0.932 | 0.652  | 0.452 | 0.441               | 0.692          | 0.758        | 0.875     | 0.796                  | 0.376    | 0.375 | 0.798 | 0.672               | 0.438          | 0.561        | 0.679   | 0.724                  | 0.151    |       |
| 19                 | -1     | -1 | -1   | -1  | -1  | 5.20  | 0.885 | 0.701  | 0.473 | 0.451               | 0.716          | 0.763        | 0.816     | 0.721                  | 0.389    | 0.422 | 0.769 | 0.690               | 0.453          | 0.560        | 0.699   | 0.738                  | 0.171    |       |
| 20                 | -1     | -1 | -1   | -1  | -1  | 6.53  | 0.870 | 0.646  | 0.441 | 0.419               | 0.720          | 0.757        | 0.873     | 0.791                  | 0.126    | 0.393 | 0.756 | 0.782               | 0.448          | 0.576        | 0.670   | 0.708                  | 0.136    |       |
| 21                 | -1     | -1 | -1   | -1  | -1  | -2.96 | 0.491 | 0.882  | 0.579 | 0.515               | 0.847          | 0.763        | 0.705     | 0.657                  | 0.225    | 0.137 | 0.636 | 0.631               | 0.419          | 0.544        | 0.683   | 0.723                  | 0.056    |       |
| 22                 | -1     | -1 | -1   | -1  | -1  | 1.298 | 0.864 | 0.906  | 0.562 | 0.550               | 0.823          | 0.805        | 0.792     | 0.813                  | 0.053    | 0.215 | 0.622 | 0.567               | 0.441          | 0.543        | 0.546   | 0.560                  | 0.035    |       |
| 23                 | -1     | -1 | -1   | -1  | -1  | 1.64  | 0.791 | 0.824  | 0.562 | 0.532               | 0.836          | 0.832        | 0.902     | 0.834                  | 0.440    | 0.300 | 0.696 | 0.711               | 0.429          | 0.575        | 0.657   | 0.687                  | 0.122    |       |
| 24                 | -1     | -1 | -1   | -1  | -1  | 3.52  | 0.880 | 0.798  | 0.587 | 0.530               | 0.820          | 0.809        | 0.891     | 0.892                  | 0.079    | 0.246 | 0.780 | 0.686               | 0.430          | 0.533        | 0.541   | 0.519                  | 0.081    |       |
| 25                 | -1     | -1 | -1   | -1  | -1  | 1.62  | 0.649 | 0.203  | 0.037 | 0.288               | 0.621          | 0.228        | 0.671     | 0.586                  | 0.591    | 0.741 | 0.633 | 0.757               | 0.470          | 0.546        | 0.655   | 0.690                  | 0.304    |       |
| 26                 | -1     | -1 | -1   | -1  | -1  | 1.59  | 0.642 | 0.161  | 0.023 | 0.294               | 0.591          | 0.204        | 0.656     | 0.571                  | 0.471    | 0.779 | 0.574 | 0.781               | 0.447          | 0.536        | 0.647   | 0.671                  | 0.345    |       |
| 27                 | -1     | -1 | -1   | -1  | -1  | 1.62  | 0.649 | 0.214  | 0.035 | 0.314               | 0.632          | 0.234        | 0.652     | 0.591                  | 0.588    | 0.723 | 0.459 | 0.582               | 0.457          | 0.582        | 0.691   | 0.691                  | 0.281    |       |
| 28                 | -1     | -1 | -1   | -1  | -1  | 1.58  | 0.641 | 0.156  | 0.007 | 0.254               | 0.616          | 0.205        | 0.704     | 0.610                  | 0.536    | 0.802 | 0.215 | 0.791               | 0.439          | 0.566        | 0.660   | 0.686                  | 0.274    |       |
| 29                 | -1     | -1 | -1   | -1  | -1  | 1.16  | 0.669 | 0.283  | 0.010 | 0.370               | 0.737          | 0.161        | 0.794     | 0.704                  | 0.653    | 0.729 | 0.324 | 0.750               | 0.451          | 0.398        | 0.678   | 0.695                  | 0.287    |       |
| 30                 | -1     | -1 | -1   | -1  | -1  | 1.143 | 0.665 | 0.232  | 0.009 | 0.320               | 0.756          | 0.078        | 0.217     | 0.239                  | 0.800    | 0.728 | 0.153 | 0.827               | 0.457          | 0.509        | 0.738   | 0.706                  | 0.301    |       |
| 31                 | -1     | -1 | -1   | -1  | -1  | 1.127 | 0.673 | 0.280  | 0.021 | 0.371               | 0.765          | 0.170        | 0.303     | 0.511                  | 0.184    | 0.709 | 0.297 | 0.810               | 0.449          | 0.421        | 0.727   | 0.746                  | 0.296    |       |
| 32                 | -1     | -1 | -1   | -1  | -1  | 1.42  | 0.665 | 0.241  | 0.009 | 0.355               | 0.758          | 0.089        | 0.437     | 0.451                  | 0.676    | 0.713 | 0.145 | 0.799               | 0.444          | 0.464        | 0.711   | 0.682                  | 0.181    |       |
| Mean               |        |    |      |     |     | 2.520 | 0.740 | 0.482  | 0.347 | 0.429               | 0.738          | 0.518        | 0.782     | 0.729                  | 0.495    | 0.340 | 0.580 | 0.677               | 0.441          | 0.519        | 0.639   | 0.659                  | 0.197    |       |
| Standard deviation |        |    |      |     |     | 4.252 | 0.123 | 0.344  | 0.251 | 0.160               | 0.101          | 0.313        | 0.175     | 0.165                  | 0.218    | 0.283 | 0.242 | 0.188               | 0.1018         | 0.050        | 0.065   | 0.080                  | 0.098    |       |

<sup>1</sup> The deconvolved image was used as the reference to compute SNR and SSIM. Since SNR of two identical images is infinity, we set SNR as 25 for test 2.  
<sup>2,3</sup> Run with different parameters, see Supplementary Material (spreadsheet 'Iacung\_Parameters')  
\* SNR and SSIM results presented are of Order 1 as presented (Deconv/BS/Norm/Fra/Med)

**FIGURE 4** SNR, SSIM, recall and precision results of each test in the factorial design performed on the image of the fungal mycelium with the order of enhancement operations Deconv/BS/Norm/Fra/Med



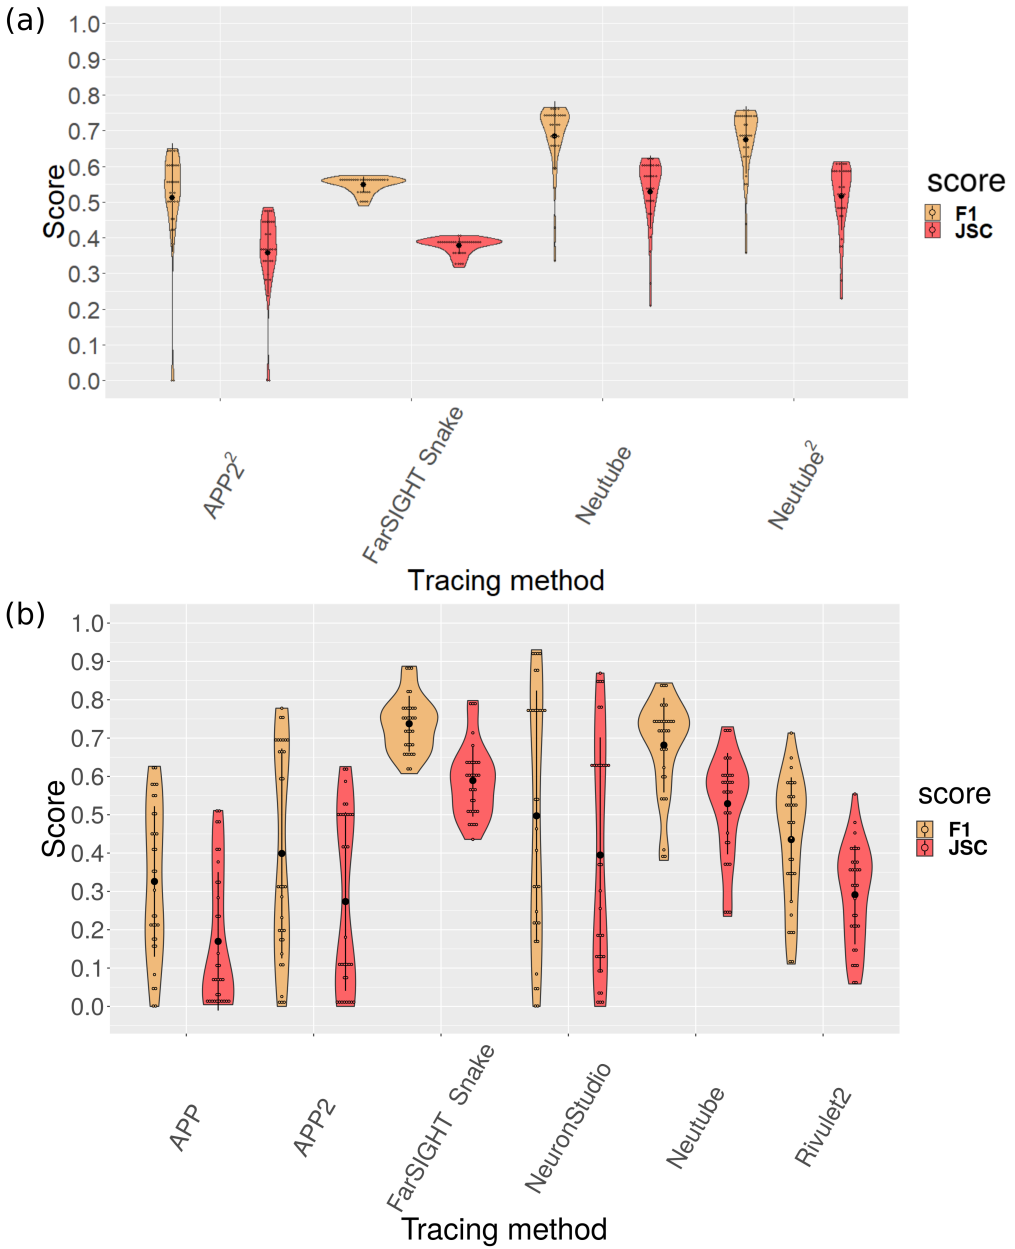

**FIGURE 5** Violin plot of the F1-score and JSC values for (a) the best performing tracing methods for the fungal mycelium image: APP2<sup>2</sup>, FarSIGHT Snake, Neutube and Neutube<sup>2</sup>. (b) F1-score and JSC results of all tracing methods for the synthetic image. Empty dots are values from the 32 tests. Black dots show mean value and lines represent the standard deviation.

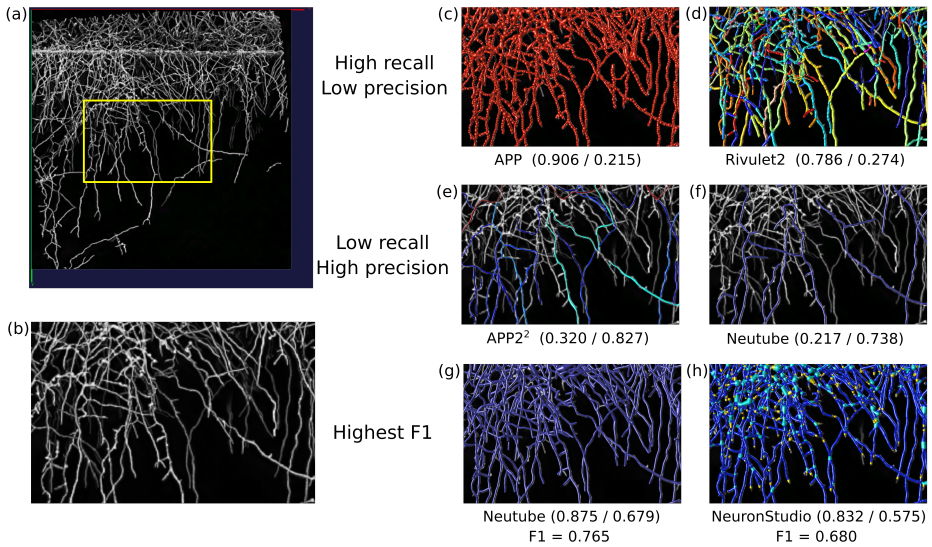

**FIGURE 6** (a) 3D rendered view of the deconvolved image of the fungal mycelium (test 2), where a subregion of interest is outlined in yellow and shown in (b-h). (c-d) tracing result overlays of methods APP test 22 and Rivulet2 test 16, which gave high recall and low precision values. (e-f) tracing result overlays of methods APP<sup>2</sup> test 30 and Neutube test 30, which yield low recall and high precision values and (g-h) the two best performing methods with respect to F1-score, Neutube (test 18) and NeuronStudio (test 23). Recall and precision values are provided for each tracing results within parentheses as: (recall / precision). Views were acquired with Vaa3D 3D viewer<sup>35</sup>.

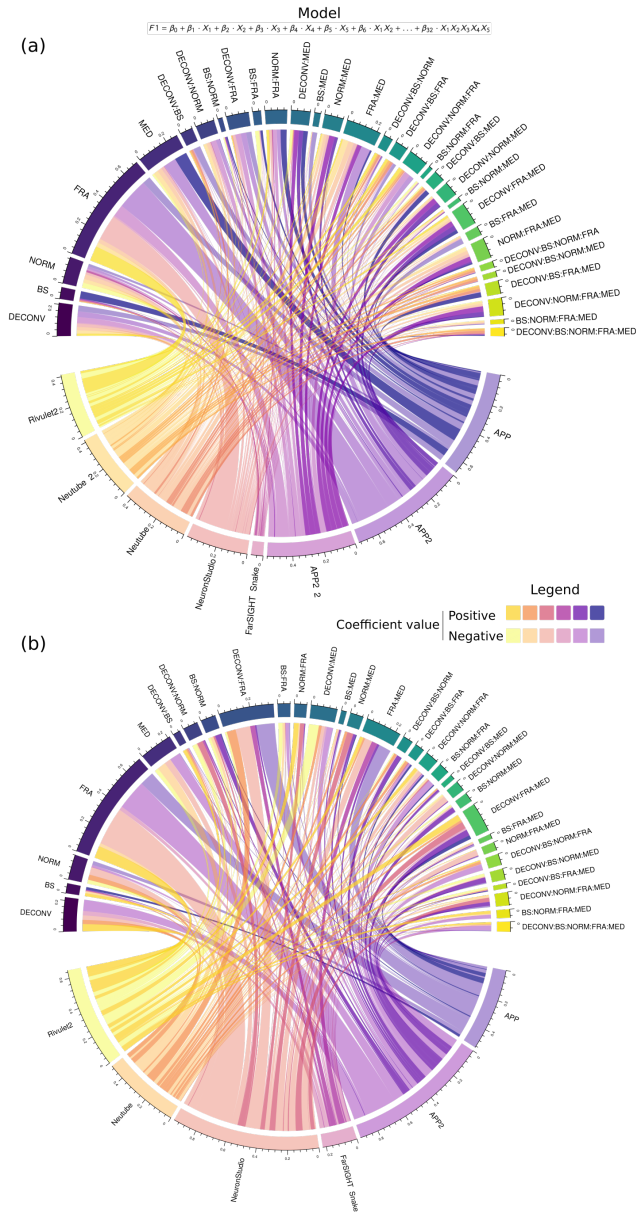

**FIGURE 7** Chord graph representing the coefficients of the effects of the factors, alone and combined, on the F1 score for the tests with (a) the fungal mycelium image and (b) the synthetic image. In each graph, the tracing methods are represented by the lower arcs, the lengths of which are equivalent to the sum of the moduli of the coefficients. Thus, the length of the arc gives an idea of the spread of the F1-score values throughout the 32 tests. The model equation shown above the chord graph shows how the F1-score is modelled as a function of the factors and its combinations. The factors  $X_1, X_2, \dots, X_5$  and their combinations are represented as arcs in the upper region of the chord graph. The lengths of these arcs are equivalent to the sums of the moduli of the coefficients of each method with respect to the factor. The length of the arc of the factor is proportional to the overall effect of the factor on all tracing methods. The coefficients that multiply each factor  $\beta_0, \beta_1 \dots \beta_{32}$  are represented as links between a method and a certain factor and are depicted in two different colour tones: an opaque colour and a transparent colour (see legend). The opaque colour represents a positive value of the coefficient (i.e. a positive effect on the F1-score), whereas the transparent colour represents a negative value of the coefficient (i.e. a negative effect on the F1-score). Raw data in the form of a table is available in the Supplementary Material Table S1.1 and S1.2. Chord graphs generated with the `circize` R library<sup>36</sup>.

| Test number        | Deconv | BS | Norm | Fra | Med | SNR*     | SSIM* | Recall |       |                |              |         | Precision |       |       |                |              |         |          |  |
|--------------------|--------|----|------|-----|-----|----------|-------|--------|-------|----------------|--------------|---------|-----------|-------|-------|----------------|--------------|---------|----------|--|
|                    |        |    |      |     |     |          |       | APP    | APP2  | FarSIGHT Snake | NeuronStudio | NeuTube | Rivulet2  | APP   | APP2  | FarSIGHT Snake | NeuronStudio | NeuTube | Rivulet2 |  |
| 1                  | -1     | -1 | -1   | -1  | -1  | 1.86     | 0.613 | 0.857  | 0.809 | 0.917          | 0.857        | 0.617   | 0.529     | 0.099 | 0.721 | 0.850          | 0.992        | 0.958   | 0.127    |  |
| 2                  | -1     | -1 | -1   | -1  | -1  | $\infty$ | 1.000 | 0.872  | 0.667 | 0.822          | 0.872        | 0.605   | 0.596     | 0.413 | 0.724 | 0.684          | 0.997        | 0.853   | 0.710    |  |
| 3                  | -1     | -1 | -1   | -1  | -1  | 2.44     | 0.626 | 0.844  | 0.817 | 0.910          | 0.844        | 0.735   | 0.596     | 0.139 | 0.743 | 0.866          | 0.988        | 0.955   | 0.178    |  |
| 4                  | -1     | -1 | -1   | -1  | -1  | 30.28    | 0.971 | 0.863  | 0.667 | 0.791          | 0.863        | 0.605   | 0.679     | 0.426 | 0.720 | 0.678          | 0.996        | 0.861   | 0.751    |  |
| 5                  | -1     | -1 | -1   | -1  | -1  | 0.97     | 0.605 | 0.755  | 0.812 | 0.912          | 0.755        | 0.752   | 0.514     | 0.280 | 0.478 | 0.766          | 0.188        | 0.961   | 0.110    |  |
| 6                  | -1     | -1 | -1   | -1  | -1  | 8.79     | 0.944 | 0.793  | 0.763 | 0.804          | 0.793        | 0.684   | 0.622     | 0.285 | 0.574 | 0.693          | 0.975        | 0.909   | 0.287    |  |
| 7                  | -1     | -1 | -1   | -1  | -1  | 1.45     | 0.616 | 0.773  | 0.800 | 0.918          | 0.773        | 0.743   | 0.549     | 0.115 | 0.581 | 0.840          | 0.204        | 0.966   | 0.152    |  |
| 8                  | -1     | -1 | -1   | -1  | -1  | 9.06     | 0.935 | 0.790  | 0.761 | 0.810          | 0.790        | 0.674   | 0.611     | 0.325 | 0.730 | 0.696          | 0.991        | 0.852   | 0.544    |  |
| 9                  | -1     | -1 | -1   | -1  | -1  | 2.35     | 0.603 | 0.423  | 0.196 | 0.686          | 0.423        | 0.532   | 0.467     | 0.643 | 0.768 | 0.661          | 0.747        | 0.752   | 0.474    |  |
| 10                 | -1     | -1 | -1   | -1  | -1  | 2.57     | 0.609 | 0.096  | 0.174 | 0.708          | 0.096        | 0.719   | 0.578     | 0.929 | 0.800 | 0.656          | 0.787        | 0.792   | 0.523    |  |
| 11                 | -1     | -1 | -1   | -1  | -1  | 2.36     | 0.603 | 0.421  | 0.196 | 0.642          | 0.421        | 0.596   | 0.451     | 0.750 | 0.763 | 0.622          | 0.753        | 0.765   | 0.427    |  |
| 12                 | -1     | -1 | -1   | -1  | -1  | 2.57     | 0.609 | 0.095  | 0.113 | 0.713          | 0.095        | 0.681   | 0.761     | 0.773 | 0.790 | 0.658          | 0.716        | 0.786   | 0.527    |  |
| 13                 | -1     | -1 | -1   | -1  | -1  | 2.12     | 0.599 | 0.280  | 0.195 | 0.578          | 0.280        | 0.774   | 0.798     | 0.700 | 0.784 | 0.640          | 0.745        | 0.732   | 0.425    |  |
| 14                 | -1     | -1 | -1   | -1  | -1  | 2.43     | 0.610 | 0.045  | 0.112 | 0.784          | 0.045        | 0.783   | 0.676     | 0.556 | 0.864 | 0.666          | 0.694        | 0.788   | 0.518    |  |
| 15                 | -1     | -1 | -1   | -1  | -1  | 2.19     | 0.601 | 0.339  | 0.196 | 0.665          | 0.339        | 0.438   | 0.367     | 0.625 | 0.769 | 0.645          | 0.731        | 0.743   | 0.425    |  |
| 16                 | -1     | -1 | -1   | -1  | -1  | 2.42     | 0.608 | 0.148  | 0.011 | 0.771          | 0.148        | 0.796   | 0.683     | 0.556 | 0.813 | 0.666          | 0.750        | 0.787   | 0.522    |  |
| 17                 | -1     | -1 | -1   | -1  | -1  | 2.21     | 0.677 | 0.626  | 0.596 | 0.726          | 0.626        | 0.421   | 0.332     | 0.253 | 0.801 | 0.842          | 0.997        | 0.973   | 0.345    |  |
| 18                 | -1     | -1 | -1   | -1  | -1  | 6.11     | 0.733 | 0.632  | 0.463 | 0.611          | 0.632        | 0.378   | 0.102     | 0.606 | 0.798 | 0.697          | 0.996        | 0.896   | 0.838    |  |
| 19                 | -1     | -1 | -1   | -1  | -1  | 2.72     | 0.62  | 0.631  | 0.631 | 0.747          | 0.631        | 0.444   | 0.330     | 0.407 | 0.803 | 0.884          | 0.999        | 0.974   | 0.383    |  |
| 20                 | -1     | -1 | -1   | -1  | -1  | -0.55    | 0.673 | 0.635  | 0.075 | 0.585          | 0.635        | 0.386   | 0.431     | 0.618 | 0.797 | 0.710          | 0.994        | 0.883   | 0.867    |  |
| 21                 | -1     | -1 | -1   | -1  | -1  | 1.64     | 0.670 | 0.636  | 0.622 | 0.730          | 0.636        | 0.568   | 0.343     | 0.237 | 0.764 | 0.832          | 0.974        | 0.959   | 0.338    |  |
| 22                 | -1     | -1 | -1   | -1  | -1  | 5.25     | 0.731 | 0.630  | 0.595 | 0.648          | 0.630        | 0.541   | 0.067     | 0.544 | 0.000 | 0.690          | 0.993        | 0.921   | 0.750    |  |
| 23                 | -1     | -1 | -1   | -1  | -1  | 2.10     | 0.666 | 0.635  | 0.639 | 0.728          | 0.635        | 0.583   | 0.327     | 0.347 | 0.777 | 0.846          | 0.982        | 0.963   | 0.385    |  |
| 24                 | -1     | -1 | -1   | -1  | -1  | 5.41     | 0.683 | 0.628  | 0.577 | 0.622          | 0.628        | 0.556   | 0.060     | 0.553 | 0.800 | 0.712          | 0.993        | 0.813   | 0.705    |  |
| 25                 | -1     | -1 | -1   | -1  | -1  | 1.23     | 0.574 | 0.185  | 0.135 | 0.819          | 0.185        | 0.264   | 0.600     | 0.845 | 0.815 | 0.755          | 0.827        | 0.840   | 0.403    |  |
| 26                 | -1     | -1 | -1   | -1  | -1  | 1.32     | 0.576 | 0.026  | 0.011 | 0.689          | 0.026        | 0.639   | 0.581     | 0.690 | 0.846 | 0.695          | 0.617        | 0.868   | 0.466    |  |
| 27                 | -1     | -1 | -1   | -1  | -1  | 1.24     | 0.574 | 0.129  | 0.112 | 0.821          | 0.129        | 0.248   | 0.592     | 0.857 | 0.844 | 0.746          | 0.823        | 0.821   | 0.417    |  |
| 28                 | -1     | -1 | -1   | -1  | -1  | 1.33     | 0.576 | 0.022  | 0.013 | 0.701          | 0.022        | 0.655   | 0.613     | 0.481 | 0.778 | 0.710          | 0.568        | 0.867   | 0.489    |  |
| 29                 | -1     | -1 | -1   | -1  | -1  | 1.09     | 0.572 | 0.122  | 0.094 | 0.768          | 0.122        | 0.650   | 0.701     | 0.660 | 0.805 | 0.740          | 0.824        | 0.841   | 0.430    |  |
| 30                 | -1     | -1 | -1   | -1  | -1  | 1.25     | 0.576 | 0.000  | 0.058 | 0.787          | 0.000        | 0.637   | 0.680     | 0.556 | 0.714 | 0.736          | 0.000        | 0.865   | 0.456    |  |
| 31                 | -1     | -1 | -1   | -1  | -1  | 1.14     | 0.572 | 0.128  | 0.100 | 0.796          | 0.128        | 0.289   | 0.680     | 0.660 | 0.855 | 0.746          | 0.851        | 0.847   | 0.425    |  |
| 32                 | -1     | -1 | -1   | -1  | -1  | 1.22     | 0.575 | 0.001  | 0.060 | 0.771          | 0.001        | 0.661   | 0.628     | 0.556 | 0.625 | 0.732          | 0.100        | 0.870   | 0.447    |  |
| Mean               |        |    |      |     |     | 3.502    | 0.664 | 0.439  | 0.377 | 0.750          | 0.439        | 0.582   | 0.516     | 0.509 | 0.733 | 0.730          | 0.775        | 0.864   | 0.463    |  |
| Maximum            |        |    |      |     |     | 30.276   | 1.000 | 0.872  | 0.817 | 0.918          | 0.872        | 0.796   | 0.761     | 0.929 | 0.864 | 0.884          | 0.999        | 0.974   | 0.867    |  |
| Standard deviation |        |    |      |     |     | 5.415    | 0.123 | 0.314  | 0.303 | 0.093          | 0.314        | 0.154   | 0.190     | 0.230 | 0.159 | 0.074          | 0.282        | 0.074   | 0.190    |  |

\* SNR and SSIM results presented are of Order 1 as presented (Deconv/BS/Norm/Fra/Med)

FIGURE 8 SNR, SSIM, recall and precision results of each test of the factorial design performed on the synthetic image with the order of enhancement operations Deconv/BS/Norm/Fra/Med.

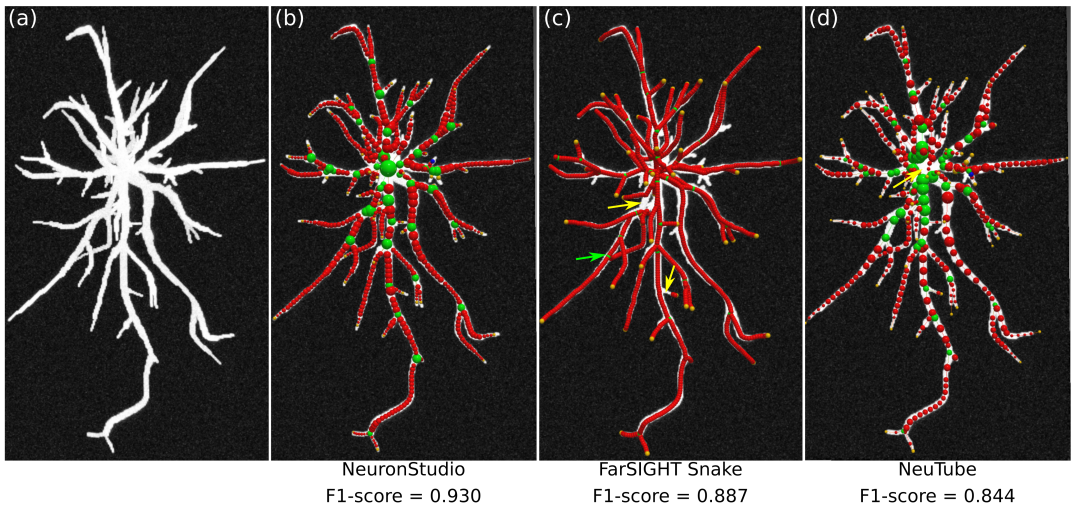

**FIGURE 9** (a) Maximum intensity projection view of the synthetic image and ball-and-stick models of the best tracing results (b) NeuronStudio (test 2), (c) FarSIGHT Snake (test 3) and (d) Neutube (test 5). Red nodes correspond to body nodes, yellow nodes to end-points, green nodes to branch points and blue to seeds. The arrows show situations in which the tracing method gave incorrect topology. Yellow arrows indicate node segments that should have been connected but were not detected, whereas the green arrow shows a branch point that does not exist in the ground truth. Views were obtained with Neutube<sup>19</sup>
